# Supplementary material for: Novel artificial metalloenzymes by in vivo incorporation of metal-binding unnatural amino acids
Source: Royal Society of Chemistry journal article supplement (doi:10.1039/c4sc01525h), 2014-10-09
Supplement: c4sc01525h1.pdf [file c4sc01525h1.pdf]

# Novel artificial metalloenzymes by *in-vivo* incorporation of metal-binding unnatural amino acids

Ivana Drienovská, Ana Rioz-Martínez, Apparao Draksharapu and Gerard Roelfes\*

*<sup>a</sup>Stratingh Institute for Chemistry, University of Groningen, Nijenborgh 4, 9747 AG Groningen, The Netherlands.*

e-mail: [j.g.roelfes@rug.nl](mailto:j.g.roelfes@rug.nl)

## Supporting Information

### Table of Contents

|                                                                        |     |
|------------------------------------------------------------------------|-----|
| 1. General remarks                                                     | S2  |
| 2. Experimental procedures and characterization data of compounds      | S3  |
| 3. Molecular Biology                                                   | S7  |
| 4. Expression and purification                                         | S9  |
| 5. SDS-PAGE                                                            | S10 |
| 6. Analytical size-exclusion chromatography                            | S13 |
| 7. ESI-mass spectra                                                    | S21 |
| 8. Characterization of the complex Cu <sup>II</sup> - BpyAla formation | S39 |
| 9. Catalysis – Friedel-Crafts reaction                                 | S42 |
| 10. References                                                         | S47 |

## 1. General remarks

Chemicals were purchased from Sigma Aldrich or Acros and used without further purification. H-NMR and C-NMR spectra were recorded on a Varian 400 (400 and 100 MHz) in CDCl<sub>3</sub> or DMSO-d<sub>6</sub>. Mass spectra (HR-MS) were recorded on an Orbitrap XL (Thermo Fisher Scientific; ESI pos. mode). Enantiomeric excess determinations were performed by HPLC analysis (Chiralpak-AD column) using UV-detection (Shimadzu SCL-10Avp).

*E.coli* strains XL-1-Blue and BL21 (DE3)\_C43 (Stratagene) were used for cloning and expression. DNA sequencing was carried out by GATC-Biotech (Berlin, Germany). Primers were synthesized by Eurofins MWG Operon (Ebersberg, Germany). Restriction endonucleases were purchased from New England Biolabs. T4 DNA ligase, DNA Gel Extraction Kit and Plasmid Purifying Kit were purchased from Roche. *Pfu* Turbo polymerase was purchased from Stratagene. FPLC columns were purchased from GE Healthcare.

## 2. Experimental procedures and characterization data of compounds.

### 2.1. Synthesis of methyl 2,2'-bipyridine-5-carboxylate.

1.5 M *t*-BuLi in *n*-pentane (40.5 mmol, 2.15 eq.) was added to THF (100 mL) at -78 °C under N<sub>2</sub> atmosphere. To this pale-yellow solution, 2-bromopyridine (22.9 mmol, 1.20 eq.) was slowly added via syringe and stirred for 30 min at the same temperature. After that time a solution of ZnCl<sub>2</sub> (10.5 mmol, 2.75 eq.) in THF (80 mL) was added. The resulting solution was allowed to warm to room temperature and stirred for 2.5 h (solution 1).

Methyl 6-chloronicotinate (19.1 mmol, 1.0 eq.) and Pd(PPh<sub>3</sub>)<sub>4</sub> (574 nmol, 3 mol%) were dissolved in THF (20 mL) under N<sub>2</sub> atmosphere (solution 2). The corresponding solution was slowly added to solution 1 and the resulting mixture was stirred at reflux for 18 h. The reaction was followed via TLC. After total consumption of the starting material, the mixture was quenched with a saturated aqueous solution of EDTA (120 mL) and stirred at room temperature for 15 min. Once finished, a saturated aqueous solution of Na<sub>2</sub>CO<sub>3</sub> was added until pH 8. The product was extracted with CH<sub>2</sub>Cl<sub>2</sub> (3 × 50 mL) and the organic layer was dried over Na<sub>2</sub>SO<sub>4</sub>, filtered and the solvent evaporated under reduced pressure. The crude residue was purified by flash chromatography on silica gel with heptane/ethyl acetate (3:1) + 5% Et<sub>3</sub>N to afford methyl 2,2'-bipyridine-5-carboxylate (3.84 g, 94% yield) as a white solid. Analytical data were in accordance with those previously published.<sup>1</sup>

<sup>1</sup>H-NMR (CDCl<sub>3</sub>-*d*<sub>1</sub>, 400 MHz):  $\delta$  3.98 (s, 3H), 7.26-7.38 (m, 1H), 7.85 (t, 1H, <sup>3</sup>*J*<sub>HH</sub> 8.0 Hz), 8.41 (d, 1H, <sup>3</sup>*J*<sub>HH</sub> 8.0 Hz), 8.48-8.51 (m, 2H), 8.70 (d, 1H, <sup>3</sup>*J*<sub>HH</sub> 4.0 Hz) and 9.27 (s, 1H).

### 2.2. Synthesis of 5-(bromomethyl) 2,2'-bipyridine.

To a solution of methyl 2,2'-bipyridine-5-carboxylate (17.9 mmol, 1.0 eq.) in anhydrous THF (83 mL) at 0 °C was added lithium borohydride (89.5 mmol, 5.0 eq.). The reaction mixture was stirred at this temperature for 16 hours and then quenched slowly with 166 mL of water. After the evaporation of THF under reduced pressure, the product was extracted with CH<sub>2</sub>Cl<sub>2</sub> (3 × 50 mL) and the organic layer was dried over Na<sub>2</sub>SO<sub>4</sub> and filtered. The solution was then concentrated under reduced pressure to afford 3.27 g of 5-(hydroxymethyl)-2,2'-bipyridine as a thick orange oil which was used in the subsequent reaction without purification.

The product from the preceding reaction was dissolved in CH<sub>2</sub>Cl<sub>2</sub> (40 mL) and cooled to 0 °C. To this solution, tetrabromomethane (20.3 mmol, 1.13 eq.) and triphenylphosphine (20.3 mmol, 1.13 eq.) were slowly added. After stirring for 16 hours, the reaction mixture was concentrated to approximately one quarter of the original volume and applied directly to a flash silica gel column (eluent: heptane/Et<sub>2</sub>O (1:1)). Concentration of the pure fractions under reduced pressure provided 2.7 g (50% yield over two steps) of 5-(bromomethyl)-2,2'-bipyridine as a pale yellow solid. Analytical data were in accordance with those previously published.<sup>2</sup>

<sup>1</sup>H-NMR (CDCl<sub>3</sub>-d<sub>1</sub>, 400 MHz): δ 4.54 (s, 2H), 7.26-7.34 (m, 1H), 7.80-7.84 (m, 2H), 8.40 (d, 2H, <sup>3</sup>J<sub>HH</sub> 8.0 Hz) and 8.60 (s, 2H).

### 2.3. Synthesis of (2,2'-bipyridin-5-yl)alanine.

To a solution of diethyl acetaminomalonate (13.4 mmol, 1.5 eq.) and NaOEt (13.4 mmol, 1.5 eq.) in EtOH (80 mL, anhydrous), 5-(bromomethyl) 2,2'- bipyridine ( 9.0 mmol, 1.0 eq.) was added under an N<sub>2</sub> atmosphere. The reaction mixture was heated to reflux overnight. The solvent was evaporated under reduced pressure and the residue was purified by silica gel flash column chromatography heptane/EtOAc 1:1 (until isolation of the compound that corresponds to the first spot in the TLC) and then CH<sub>2</sub>Cl<sub>2</sub>/MeOH 9:1 to give diethyl 2-(2,2'-bipyridin-5-ylmethyl)-2-acetamidomalonate as a white solid (3.5 g, 70%).<sup>3</sup>

<sup>1</sup>H-NMR (CDCl<sub>3</sub>-d<sub>1</sub>, 400 MHz): δ 1.30 (t, 6H, <sup>3</sup>J<sub>HH</sub> 8.0 Hz), 2.06 (s, 3H), 3.73 (s, 2H), 4.19-4.21 (c, 4H, <sup>3</sup>J<sub>HH</sub> 8.0 Hz), 6.60 (s, 1H), 7.26-7.30 (m, 1H), 7.47 (d, 1H, <sup>3</sup>J<sub>HH</sub> 8.0 Hz), 7.78 (t, 1H, <sup>3</sup>J<sub>HH</sub> 8.0 Hz), 8.28-8.34 (m, 3H), 8.66 (d, 1H, <sup>3</sup>J<sub>HH</sub> 8.0 Hz).

Finally, a suspension of diethyl 2-(2,2'-bipyridin-5-ylmethyl)-2-acetamidomalonate (9.0 mmol) in aqueous HCl (60 mL, 37% in water) was heated to reflux overnight. The solvent was evaporated under reduced pressure to give bipyridylalanine as a white HCl salt (2.6 g, 82%), which was used in experiments without further purification. Analytical data were in accordance with those previously published.<sup>3</sup>

<sup>1</sup>H-NMR (MeOD-d<sub>1</sub>, 400 MHz): δ 3.49 (dd, 1H, <sup>3</sup>J<sub>HH</sub> 8.0 Hz, <sup>2</sup>J<sub>HH</sub> 16.0 Hz), 3.57 (dd, 1H, <sup>3</sup>J<sub>HH</sub> 8.0 Hz, <sup>2</sup>J<sub>HH</sub> 16.0 Hz), 4.52 (t, 1H, <sup>3</sup>J<sub>HH</sub> 8.0 Hz), 8.09 (t, 1H, <sup>3</sup>J<sub>HH</sub> 8.0 Hz), 8.32 (dd, 1H, <sup>3</sup>J<sub>HH</sub> 8.0 Hz, <sup>4</sup>J<sub>HH</sub> 4.0 Hz), 8.62 (d, 1H, <sup>3</sup>J<sub>HH</sub> 8.0 Hz), 8.67 (dt, 1H, <sup>3</sup>J<sub>HH</sub> 8.0 Hz, <sup>4</sup>J<sub>HH</sub> 4.0 Hz), 8.79 (d, 1H, <sup>3</sup>J<sub>HH</sub> 8.0 Hz) and 8.94-8.97 (m, 2H).

$^{13}\text{C}$ -NMR ( $\text{CD}_3\text{OD}-d_4$ , 75.4 MHz):  $\delta$  34.1, 54.2, 124.4, 125.2, 128.4, 136.6, 143.3, 145.5, 146.6, 147.3, 148.8, 150.2 and 170.6. HRMS ( $\text{ESI}^+$ ) calcd for  $\text{C}_{13}\text{H}_{14}\text{N}_3\text{O}_2$  ( $\text{M}+\text{H}^+$ ): 244.108; found: 244.107.

## Scheme S1

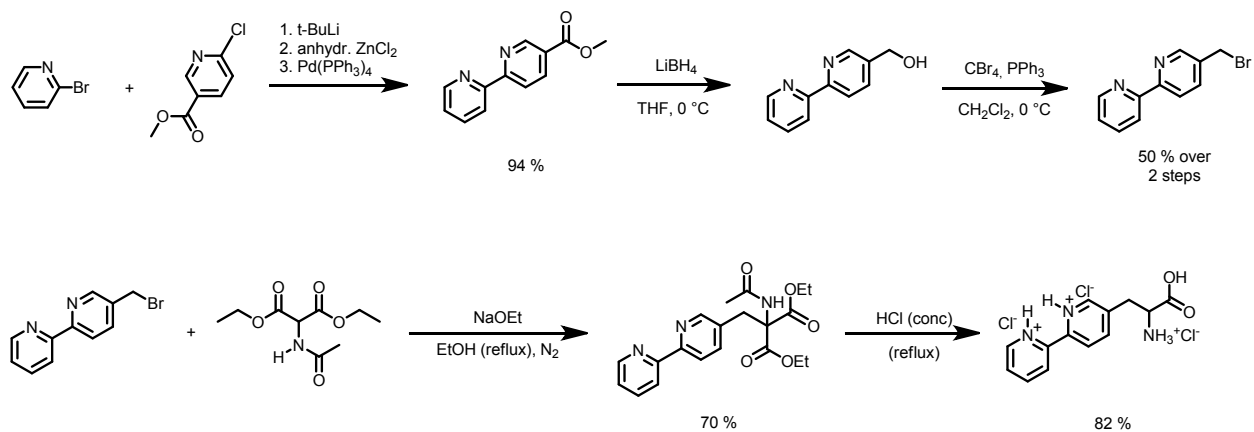

## $^1\text{H}$ -NMR

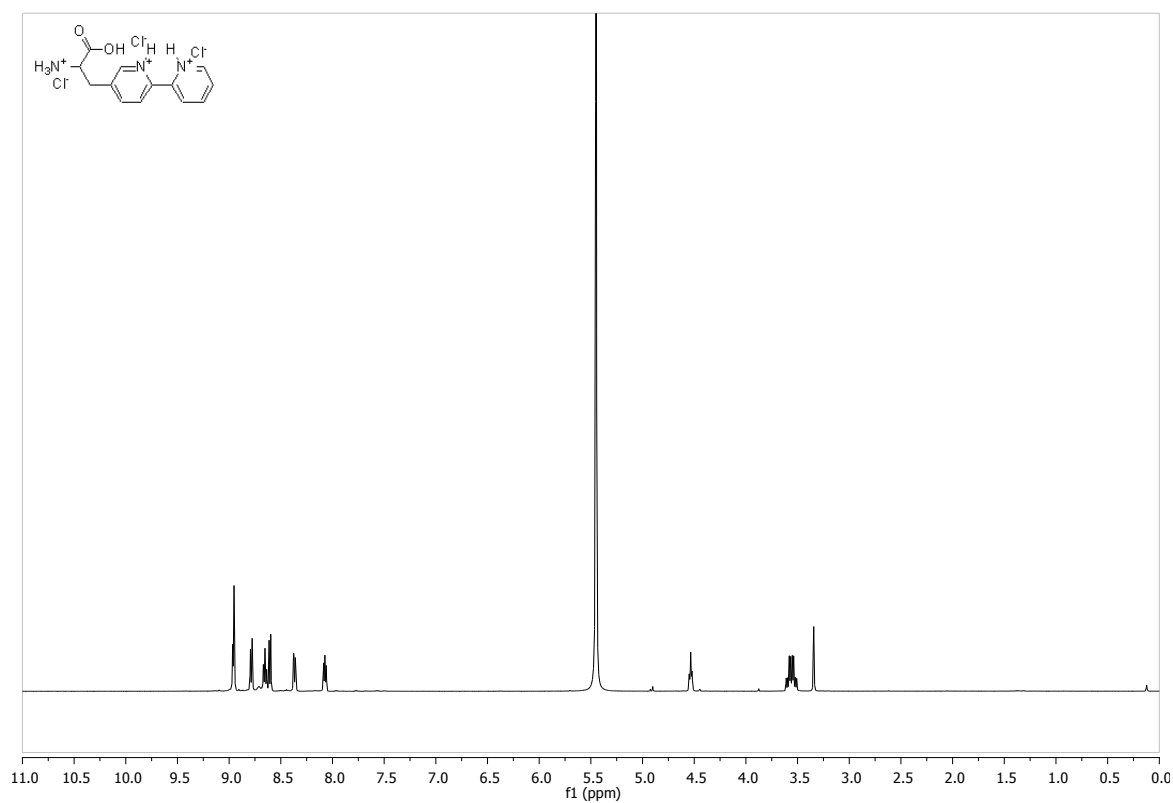

### 3. Molecular Biology

#### Gene optimization:

The synthesized gene of LmrR was ordered from GenScript (USA). The codon usage was adapted to the codon bias of *E. coli* genes. The gene was delivered in the cloning vector pUC57, containing a C-terminal strep-tag and K55D, K55Q mutations as previously described.<sup>4</sup> The gene was subsequently recloned to the pET17b expression plasmid using the restriction sites *NdeI* and *HindIII*.

#### Optimized sequence:

```
ATGGGTGCCGAAATCCCGAAAGAAATGCTGCGTGCTCAAACCAATGTCATCCTGCTGAATGTCCTGAAACAAGGCGATAACTATGT  
GTATGGCATTATCAACAGGTGAAAGAAGCGAGCAACGGTGAAATGGAAGTGAATGAAGCCACCCTGTATACGATTTTGTATCGTC  
TGGAACAGGACGGCATTATCAGCTCTTACTGGGGTGATGAAAGTCAAGGCGGTCGTCGCAAATATTACCGTCTGACCGAAATCGGC  
CATGAAAACATGCGCCTGGCGTTTCAATCCTGGAGTCGTGTGGACAAAATCATTGAAAATCTGGAAGCAACAAAAATCTGAAGC  
GATCAATCTAGAGGTGGCAGCGGTGGCTGGAGCCACCCGAGTTCGAAAAATAA
```

#### Site directed mutagenesis:

Site-directed mutagenesis was used for preparation of all LmrR mutants. The primers required for the mutagenesis are summarized in **Table S1**. The following PCR cycles were used: initial denaturation at 95 °C for 1 min, denaturation at 95 °C for 30 s, annealing at 58-63 °C for 1 min (depending on the  $T_m$  of the particular mutant) and extension at 68 °C for 5 min. The thermal cycle was repeated 16 times. The resulting PCR product was digested with restriction endonuclease DpnI for 1h at 37 °C and transformed into the *E. coli* XL1-blue cells.

**Table S1:** Primers used for site-directed mutagenesis

| Primer                | Sequence (5' → 3')                    |
|-----------------------|---------------------------------------|
| LmrR_LM_N19X_fw       | GTC ATC CTG CTG TAG GTC CTG AAA CAA G |
| LmrR_LM_N19X_rv       | CTT GTT TCA GGA CCT ACA GCA GGA TGA C |
| LmrR_LM_M89X_fw       | GGC CAT GAA AAC TAG CGC CTG GCG TTC   |
| LmrR_LM_M89X_rv       | GAA CGC CAG GCG CTA GTT TTC ATG GCC   |
| LmrR_LM_F93X_fw       | ATG CGC CTG GCG TAG GAA TCC TGG AGT   |
| LmrR_LM_F93X_rv       | ACT CCA GGA TTC CTA CGC CAG GCG CAT   |
| LmrR_LM_M89X_N19A_fw  | GTC ATC CTG CTG GCG GTC CTG AAA CAA   |
| LmrR_LM_M89X_N19A_rv  | TTG TTT CAG GAC CGC CAG CAG GAT GAC   |
| LmrR_LM_M89X_K22A_fw  | CTG AAT GTC CTG GCG CAA GGC GAT AAC   |
| LmrR_LM_M89X_K22A_rv  | GTT ATC GCC TTG CGC CAG GAC ATT CAG   |
| LmrR_LM_M89X_H86A_fw  | ACC GAA ATC GGC GCG GAA AAC TAG CGC   |
| LmrR_LM_M89X_H86A_rv  | GCG CTA GTT TTC CGC GCC GAT TTC GGT   |
| LmrR_LM_M89X_F93A_fw  | TAG CGC CTG GCG GCA GAA TCC TGG AGT   |
| LmrR_LM_M89X_F93A_rv  | ACT CCA GGA TTC TGC CGC CAG GCG CTA   |
| LmrR_LM_M89X_E107A_fw | ATT GAA AAT CTG GCG GCA AAC AAA AAA   |
| LmrR_LM_M89X_E107A_rv | TTT TTT GTT TGC CGC CAG ATT TTC AAT   |
| LmrR_LM_M89X_H86I_fw  | ACC GAA ATC GGC ATC GAA AAC TAG CGC   |
| LmrR_LM_M89X_H86I_rv  | GCG CTA GTT TTC GAT GCC GAT TTC GGT   |
| LmrR_LM_M89X_H86W_fw  | ACC GAA ATC GGC TGG GAA AAC TAG CGC   |
| LmrR_LM_M89X_H86W_rv  | GCG CTA GTT TTC CCA GCC GAT TTC GGT   |
| LmrR_LM_M89X_H86S_fw  | ACC GAA ATC GGC GCG GAA AAC TAG CGC   |
| LmrR_LM_M89X_H86S_rv  | GCG CTA GTT TTC CGC GCC GAT TTC GGT   |
| LmrR_LM_M89X_H86D_fw  | ACC GAA ATC GGC GCG GAA AAC TAG CGC   |
| LmrR_LM_M89X_H86D_rv  | GCG CTA GTT TTC CGC GCC GAT TTC GGT   |
| LmrR_LM_M89X_F93I_fw  | TAG CGC CTG GCG ATC GAA TCC TGG AGT   |
| LmrR_LM_M89X_F93I_rv  | ACT CCA GGA TTC GAT CGC CAG GCG CTA   |
| LmrR_LM_M89X_F93H_fw  | TAG CGC CTG GCG CAT GAA TCC TGG AGT   |
| LmrR_LM_M89X_F93H_rv  | ACT CCA GGA TTC ATG CGC CAG GCG CTA   |
| LmrR_LM_M89X_F93W_fw  | TAG CGC CTG GCG TGG GAA TCC TGG AGT   |
| LmrR_LM_M89X_F93W_rv  | ACT CCA GGA TTC CCA CGC CAG GCG CTA   |
| LmrR_LM_M89X_F93D_fw  | TAG CGC CTG GCG GAT GAA TCC TGG AGT   |
| LmrR_LM_M89X_F93D_rv  | ACT CCA GGA TTC ATC CGC CAG GCG CTA   |

#### 4. Expression and purification

The plasmids pEVOL-BpyA and pET17b\_LmrR\_LM\_X were cotransformed into *E. coli* BL21 (DE3)\_C43 and a single colony was used to inoculate an overnight culture of 10 mL of fresh LB medium containing 100 µg/mL of ampicillin and 34 µg/ml of chloramphenicol. 2 mL (500x dilutions) of overnight culture was used to inoculate 1 L of fresh LB medium containing 100 µg/mL of ampicillin 34 µg/ml of chloramphenicol. When the culture reached an optical density at 600 nm of 0.8–0.9, the expression was induced with isopropyl β-D-1-thiogalactopyranoside (IPTG) (final concentration 1 mM) and L-Arabinose (final concentration 0.02%). Expression was done overnight at 30 °C. Cells were harvested by centrifugation (6000 rpm, JA10, 20 min, 4 °C, Beckman), resuspended in washing buffer (50 mM NaH<sub>2</sub>PO<sub>4</sub>, 150 mM NaCl, 10% glycerol, pH 8.0) and sonicated (75% (200W) for 5 min (10 sec on, 15 sec off). The lysed cells were incubated with DNaseI (final concentration 0.1 mg/mL with 10 mM MgCl<sub>2</sub>) and PMSF solution (final concentration 0.1 mM) for 1 hour at 30 °C. After centrifugation (15000 rpm, JA-17, 1h, 4 °C, Beckman), the supernatant was loaded on a Strep-Tactin column and incubated for 1 h. The column was washed with 3 x 1 CV (column volume) of resuspension buffer (same as wash buffer used before), and eluted with 6 x 0.5 CV of resuspension buffer containing 2.5 mM desthiobiotin. The fractions were analyzed on a 12% polyacrylamide SDS-Tris Tricine gel followed by Coomassie staining. The concentration of the proteins was determined by using the calculated extinction coefficient  $\epsilon_{280} = 25440 \text{ M}^{-1} \text{ cm}^{-1}$  (F93W mutant:  $\epsilon_{280} = 30940 \text{ M}^{-1} \text{ cm}^{-1}$ ) and corrected for the absorbance of the BpyAla. The correction factor for protein with BpyAla was determined by a standard Bradford assay using ‘wildtype’ LmrR as standard. Expression yields were 6-18 mg/L. In order to use proteins in the catalysis, they were dialysed against MOPS buffer (20 mM MOPS, 150 NaCl, pH=7.0) overnight at 4 °C. Two mutants, i.e. LmrR\_LM\_F93X and LmrR\_LM\_M89X\_F93D, were incubated with 500 mM EDTA for 4 hours prior to dialysis.

5. SDS-PAGE

Figure S1: SDS-PAGE gels of the LmrR mutants after Strep-Tag purification.

LmrR\_LM\_N19X

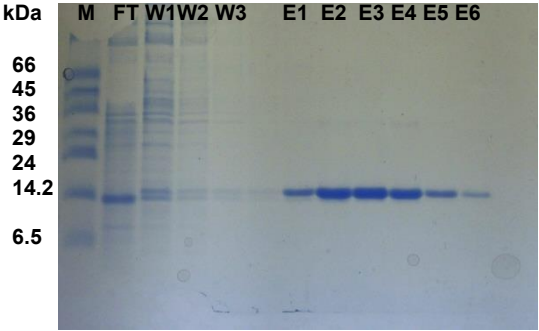

LmrR\_LM\_M89X

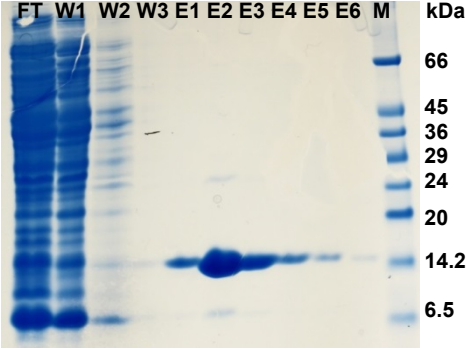

LmrR\_LM\_F93X

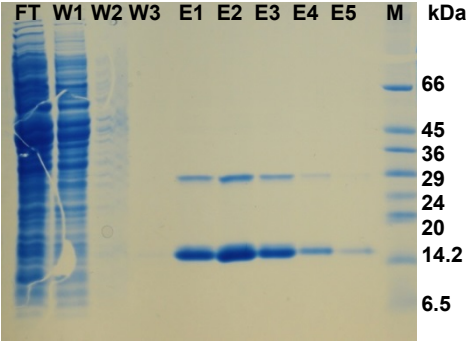

LmrR\_LM\_M89X\_N19A

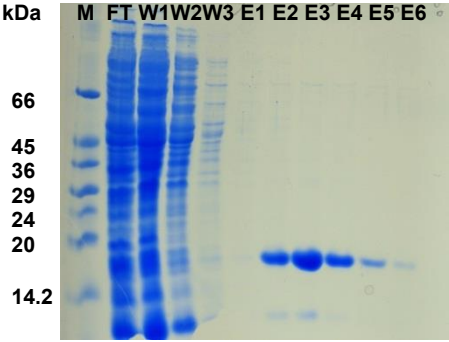

LmrR\_LM\_M89X\_K22A

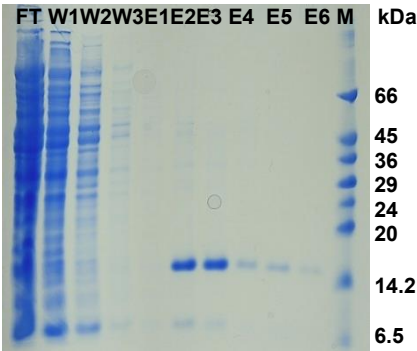

LmrR\_LM\_M89X\_H86A

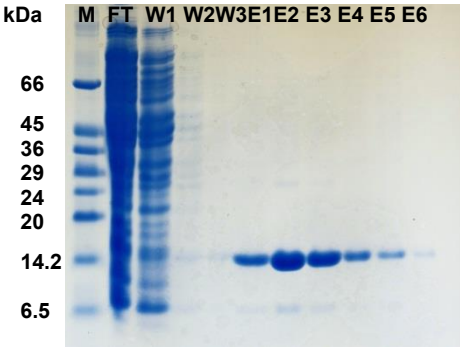

LmrR\_LM\_M89X\_F93A

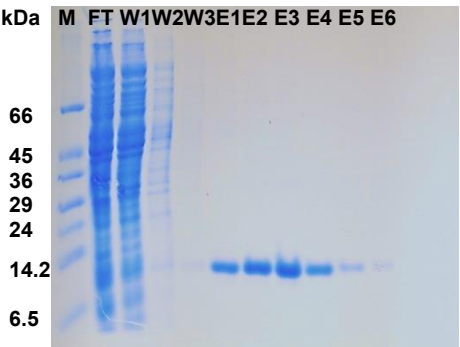

LmrR\_LM\_M89X\_E107A

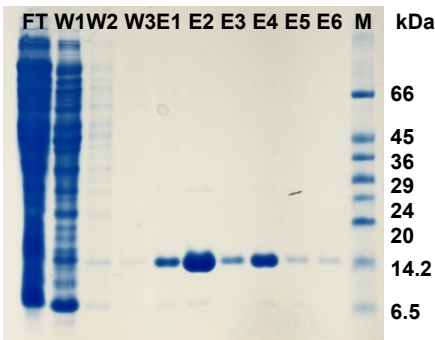

LmrR\_LM\_M89X\_H86I

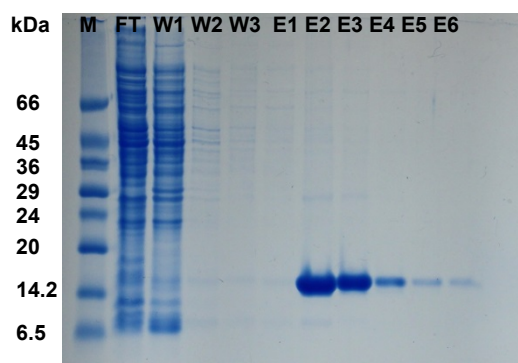

LmrR\_LM\_M89X\_H86S

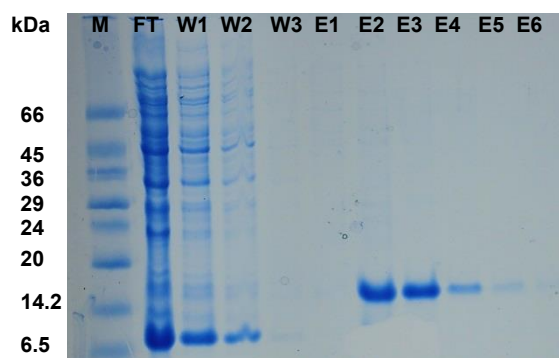

LmrR\_LM\_M89X\_H86W

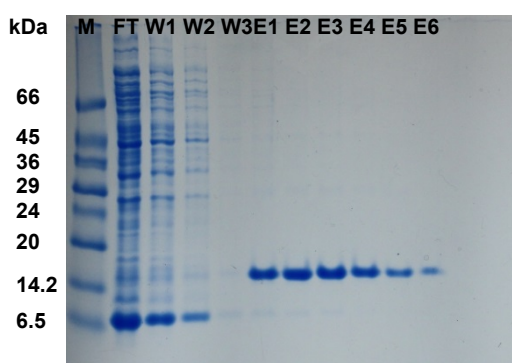

LmrR\_LM\_M89X\_H86D

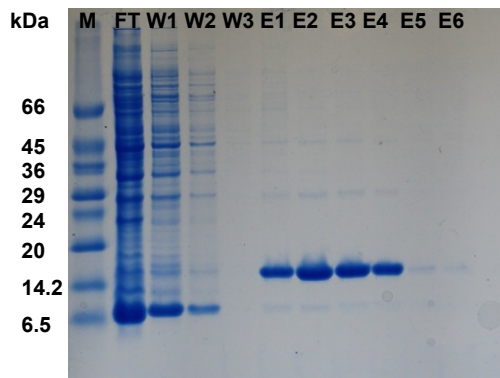

LmrR\_LM\_M89X\_F93I

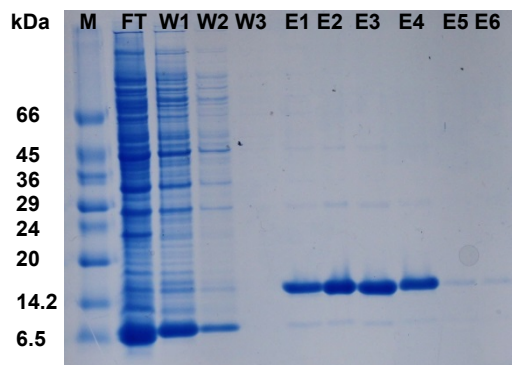

LmrR\_LM\_M89X\_F93H

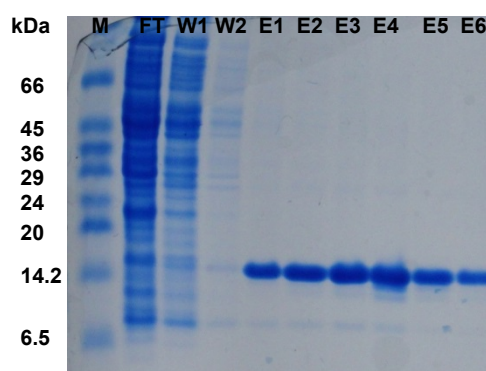

LmrR\_LM\_M89X\_F93D

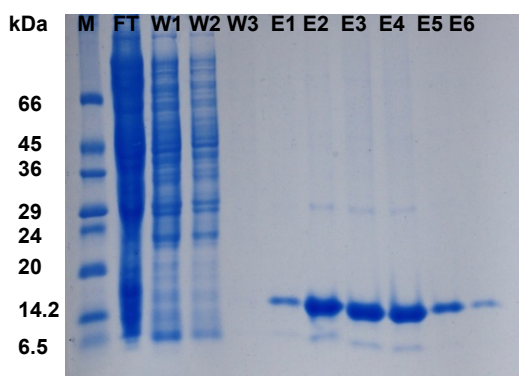

LmrR\_LM\_M89X\_F93W

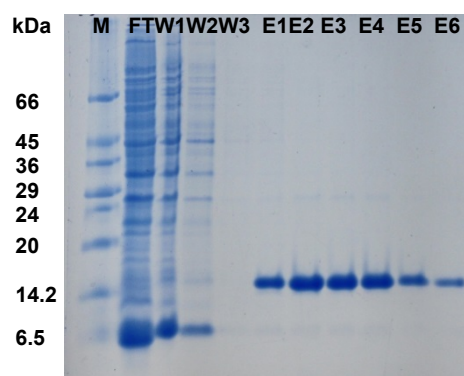

LmrR\_LM\_M89X\_N19A\_E107A

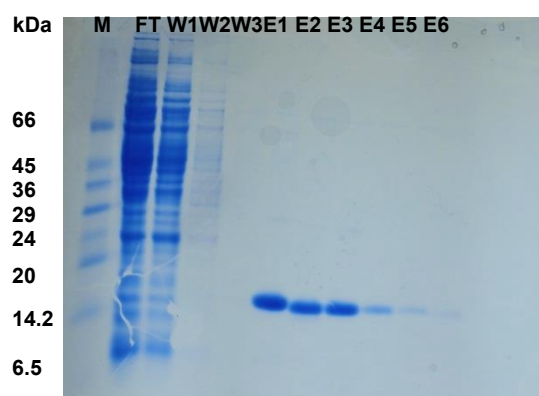

LmrR\_LM\_H86A\_E107A

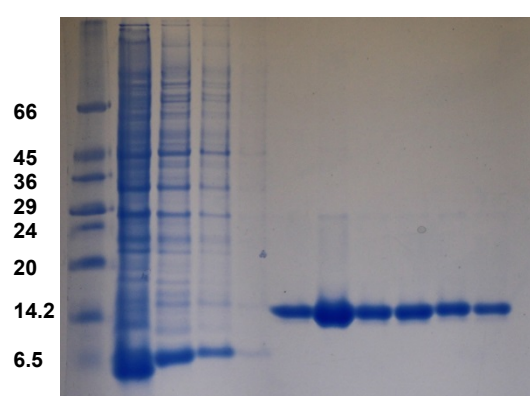

### Legend:

M- Marker (SigmaMarker™ low range, mol wt 6500-66000 Da), FT - Flowthrough column, W - wash fraction, E - elution fraction.

Gels were stained with InstantBlue™ (Expedeon).

## 6. Analytical size-exclusion chromatography

### *General procedure*

Analytical size exclusion chromatography was performed on a Superdex 75 10/300 GL (GE Healthcare). 100  $\mu$ L of the sample was injected using 20 mM MOPS, 150 mM NaCl pH 7.0, as buffer (flow 0.5 mL/min). The column was calibrated using the standard Gel Filtration LMW Calibration Kit of GE Healthcare. The mutants LmrR\_LM\_N19X/M89X/F93X were also tested in presence of  $\text{Cu}(\text{NO}_3)_2$  (90  $\mu$ M concentration – i.e. conditions of catalysis, 1:1.25 ratio)

**Figure S2:** Analytical size-exclusion chromatography (Superdex-75 10/300 GL) of LmrR and LmrR mutants.

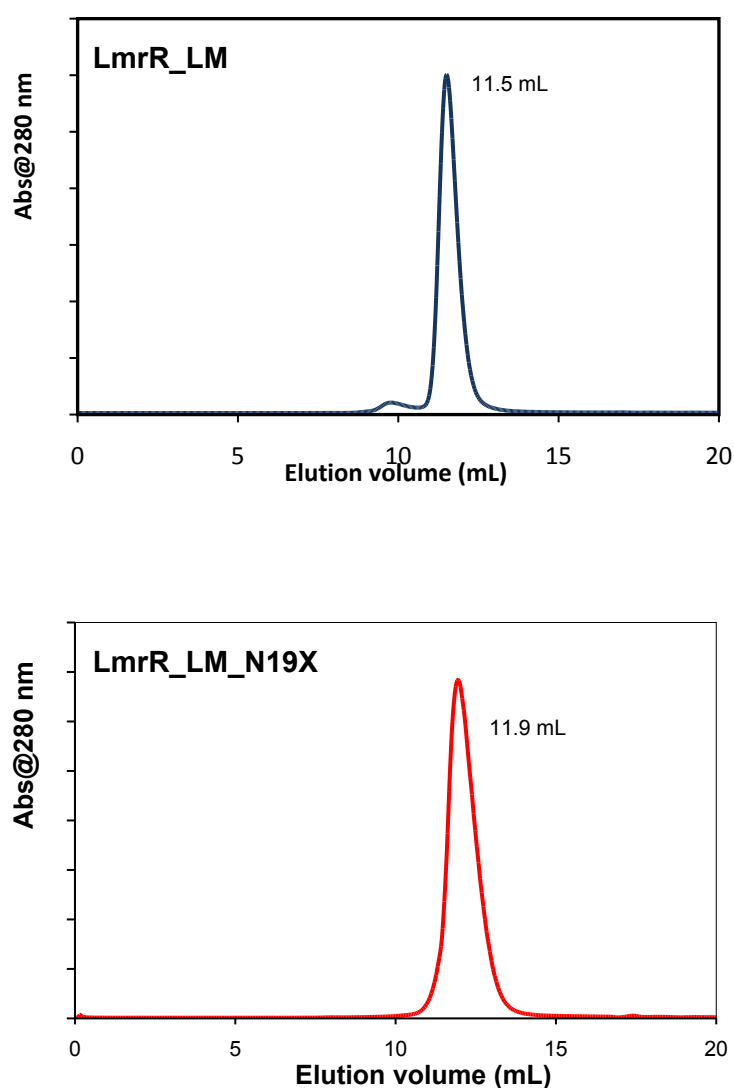

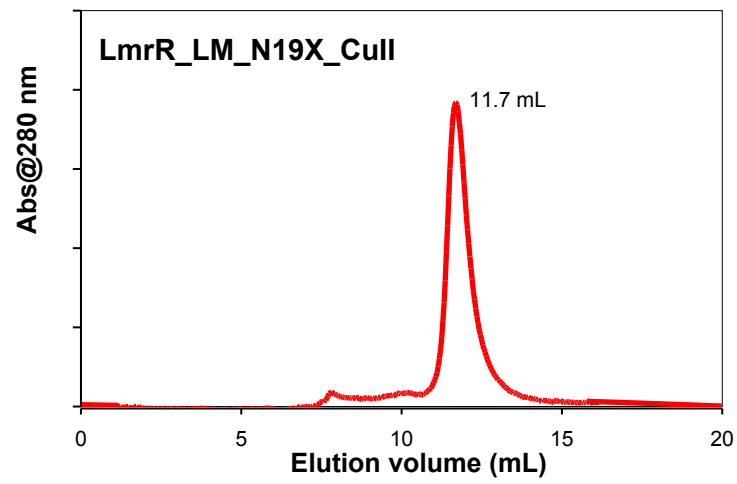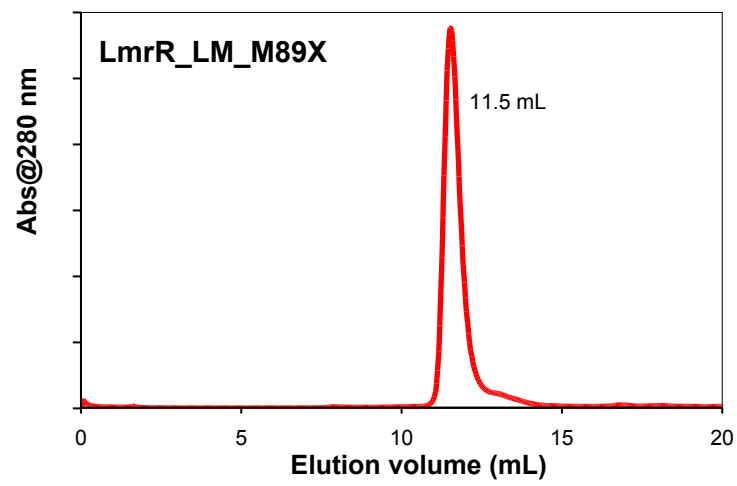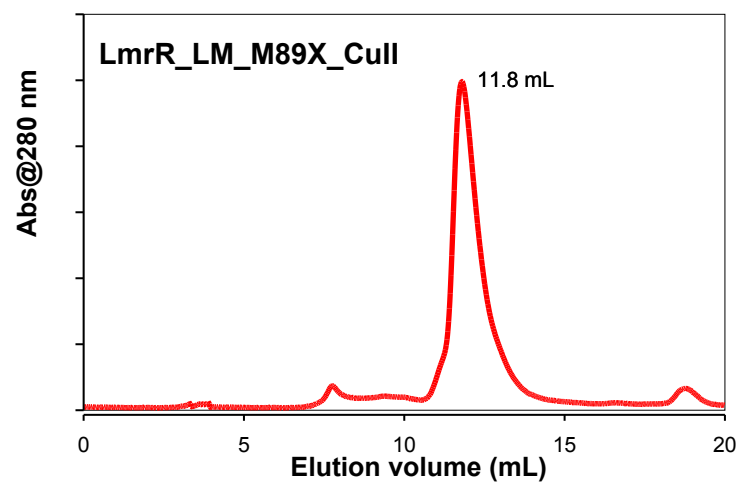

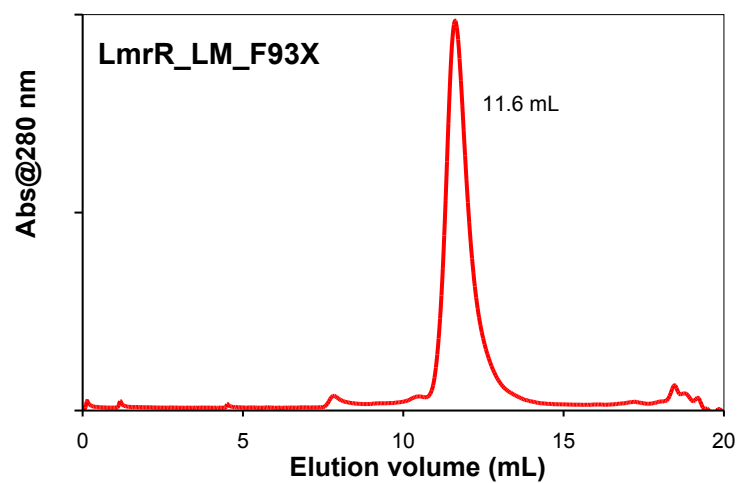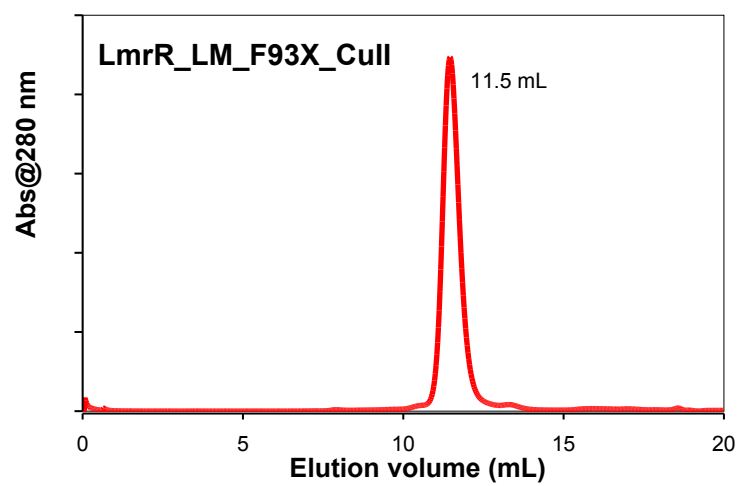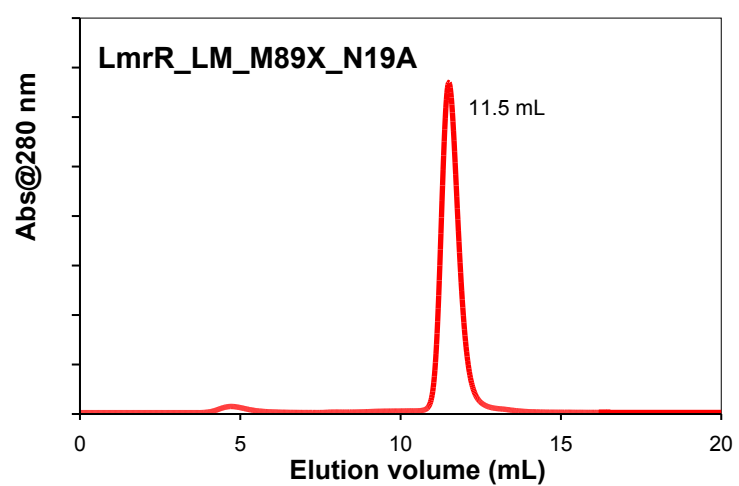

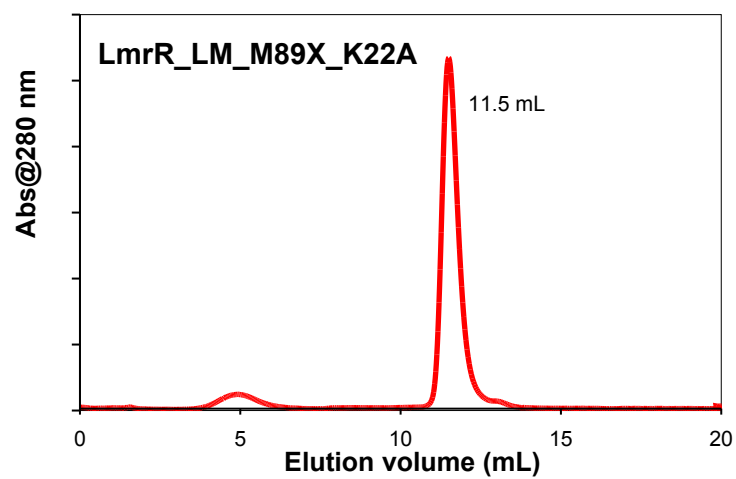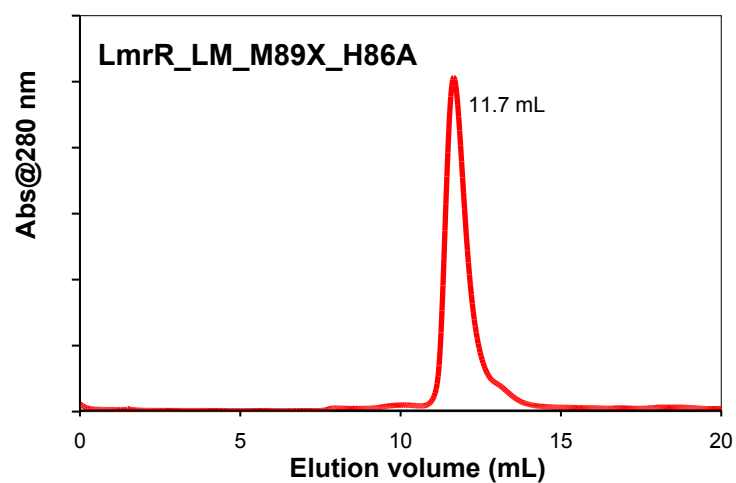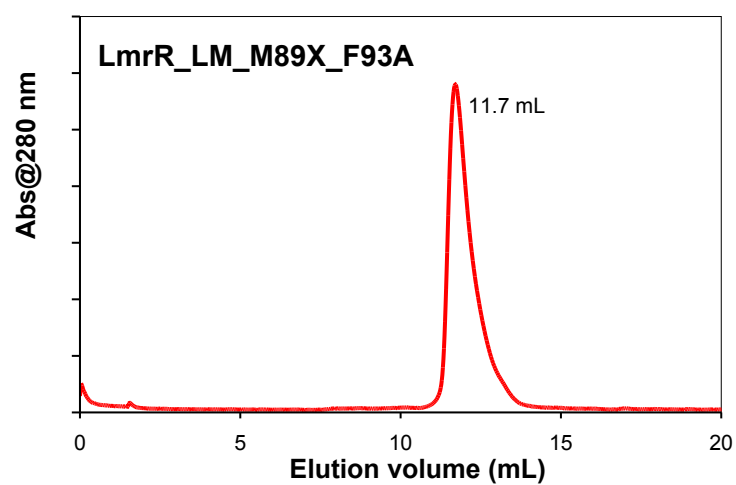

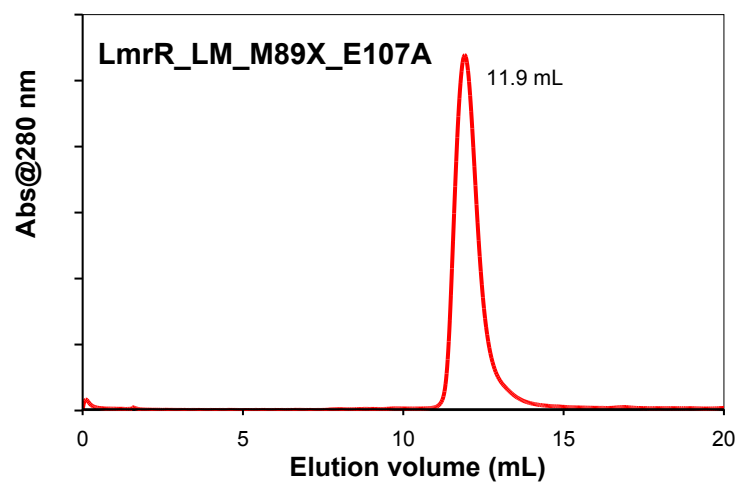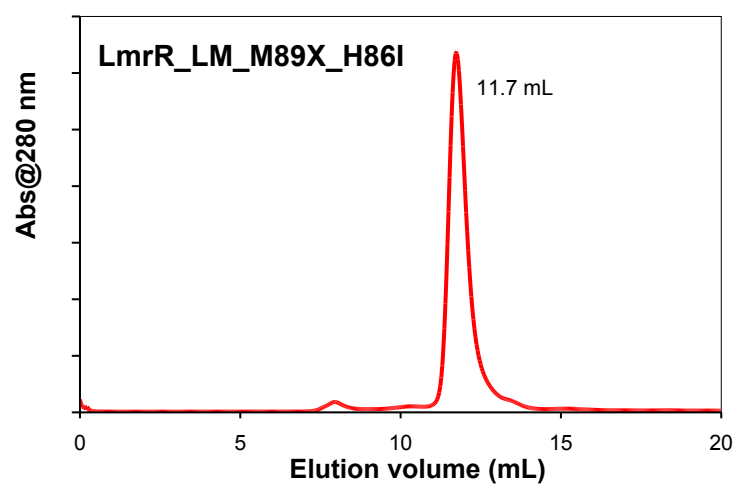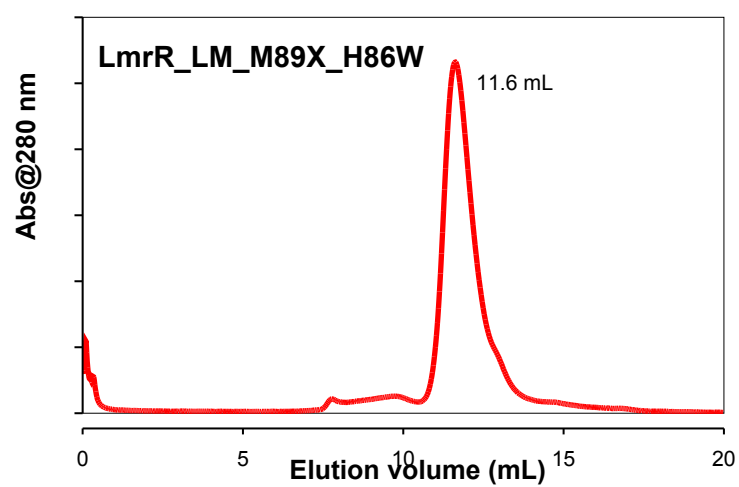

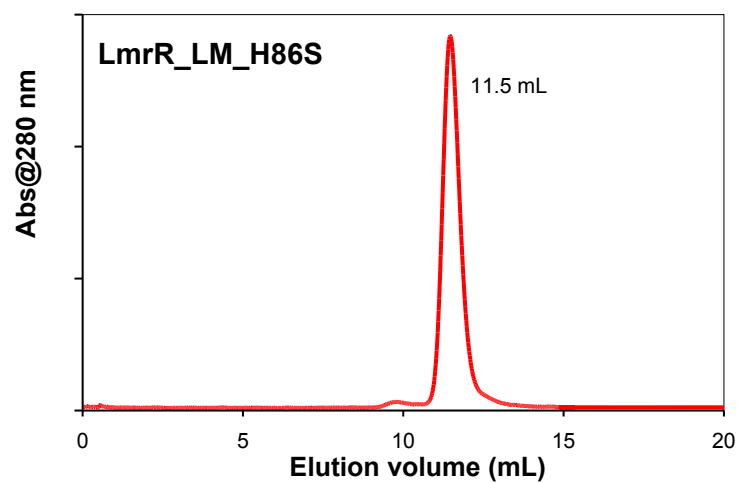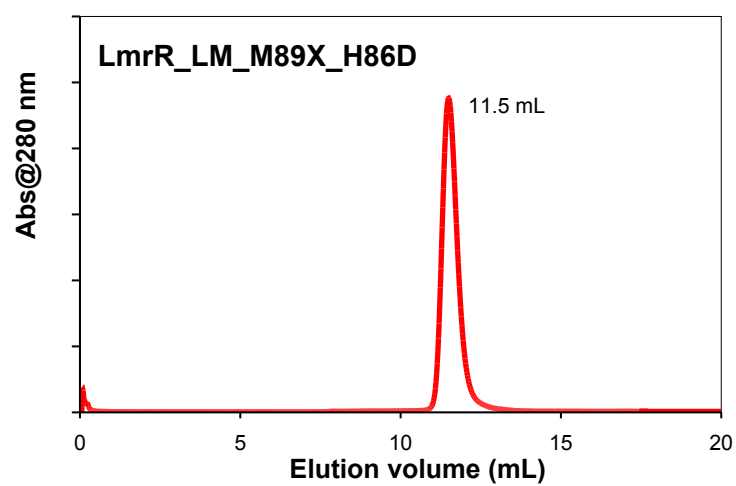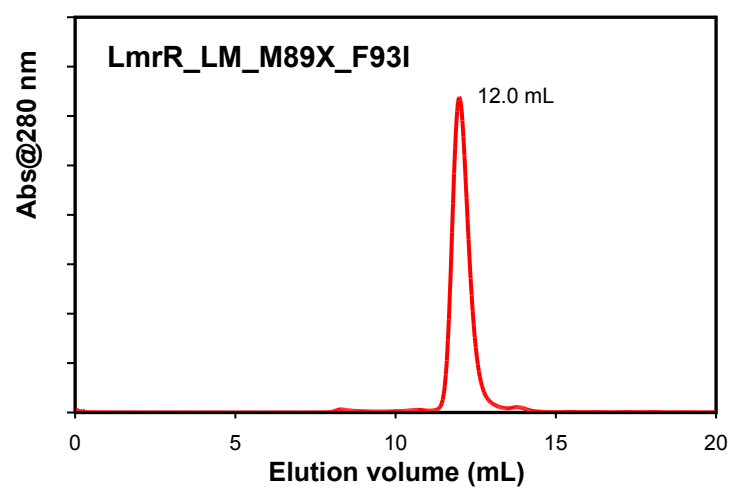

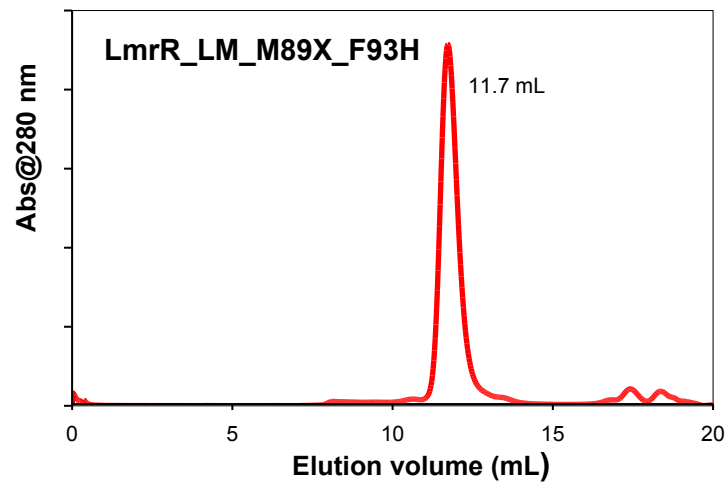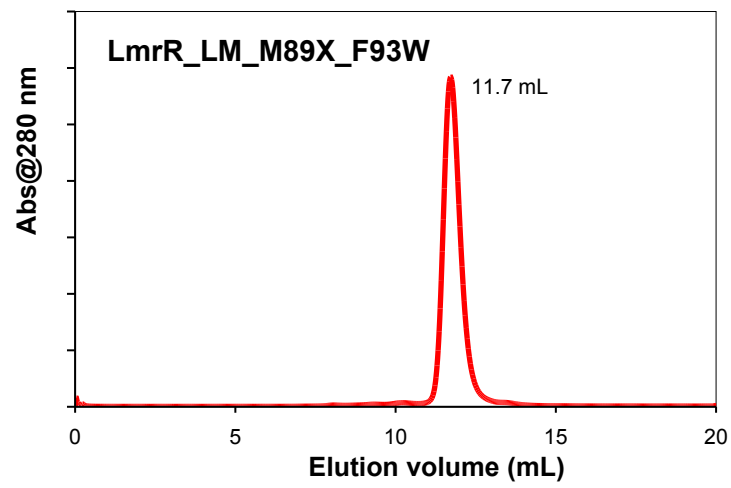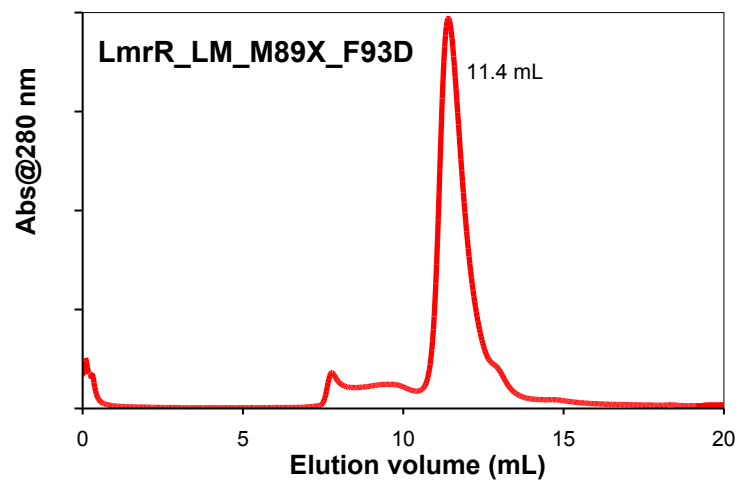

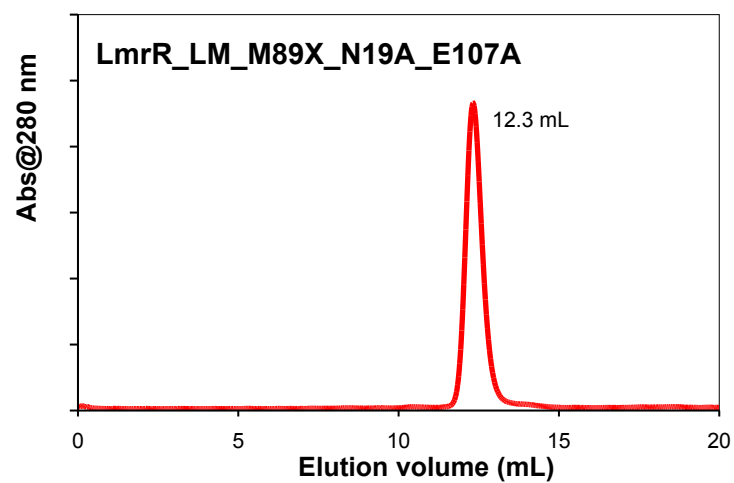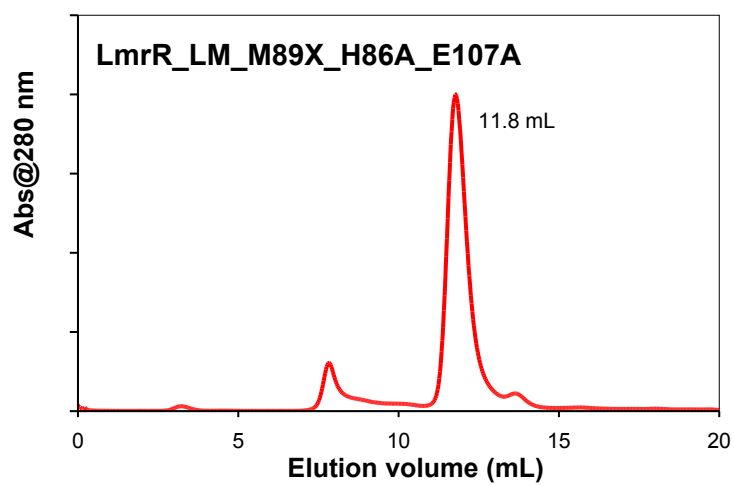

## 7. ESI-mass spectra

**Figure S3.** Electrospray ionization (ESI) mass spectra LmrR\_X mutants.

**LmrR\_LM\_N19X** calculated mass (-Met) 15082.79

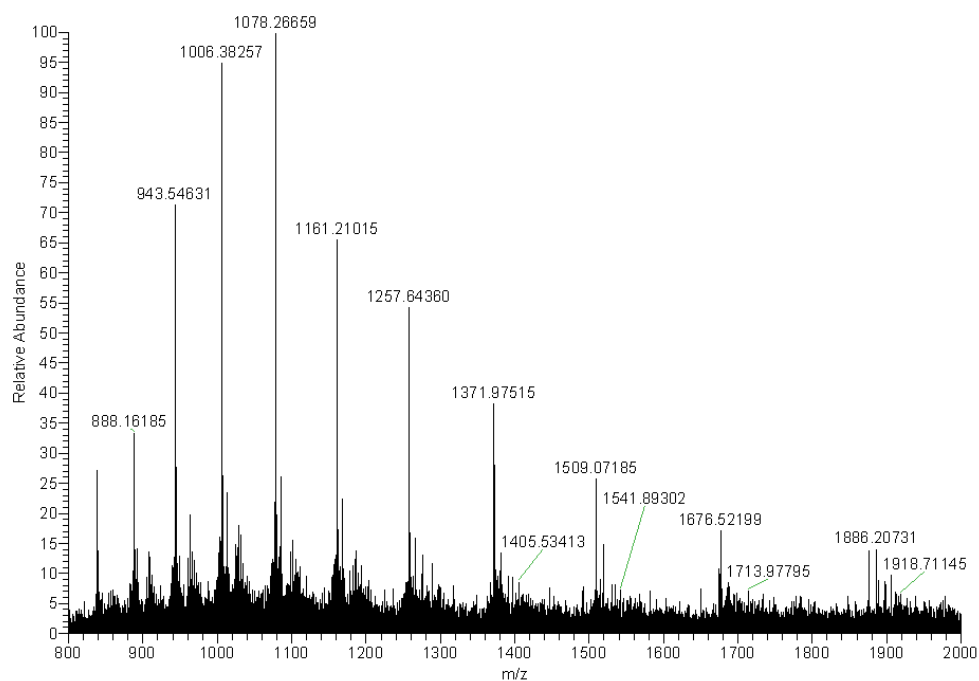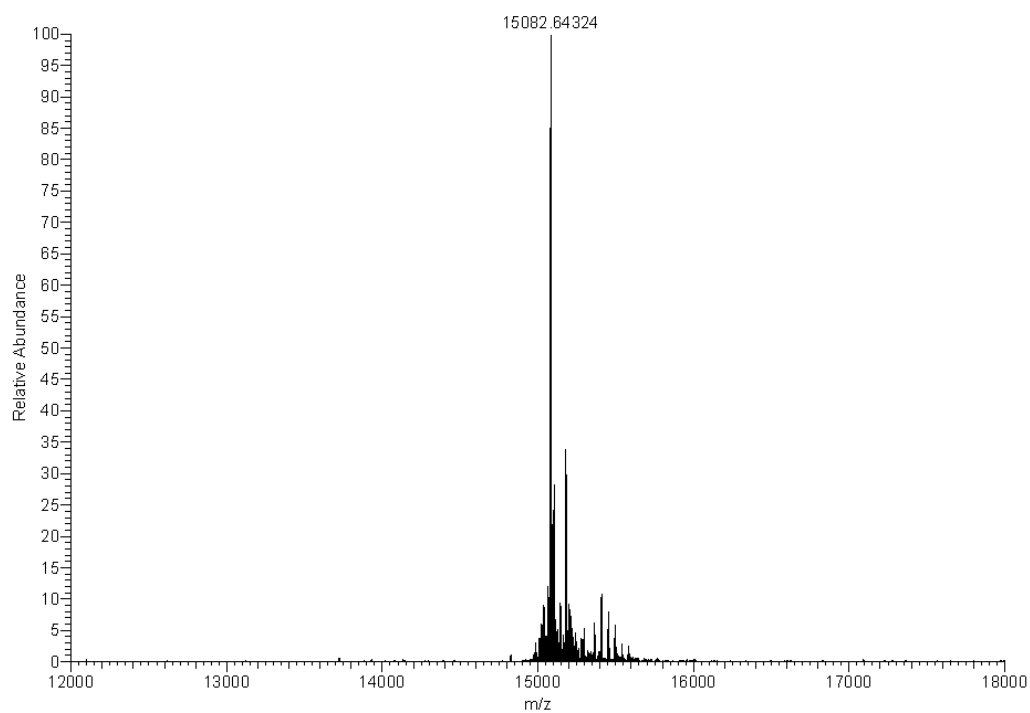

LmrR\_LM\_M89X calculated mass (-Met) 15065.70

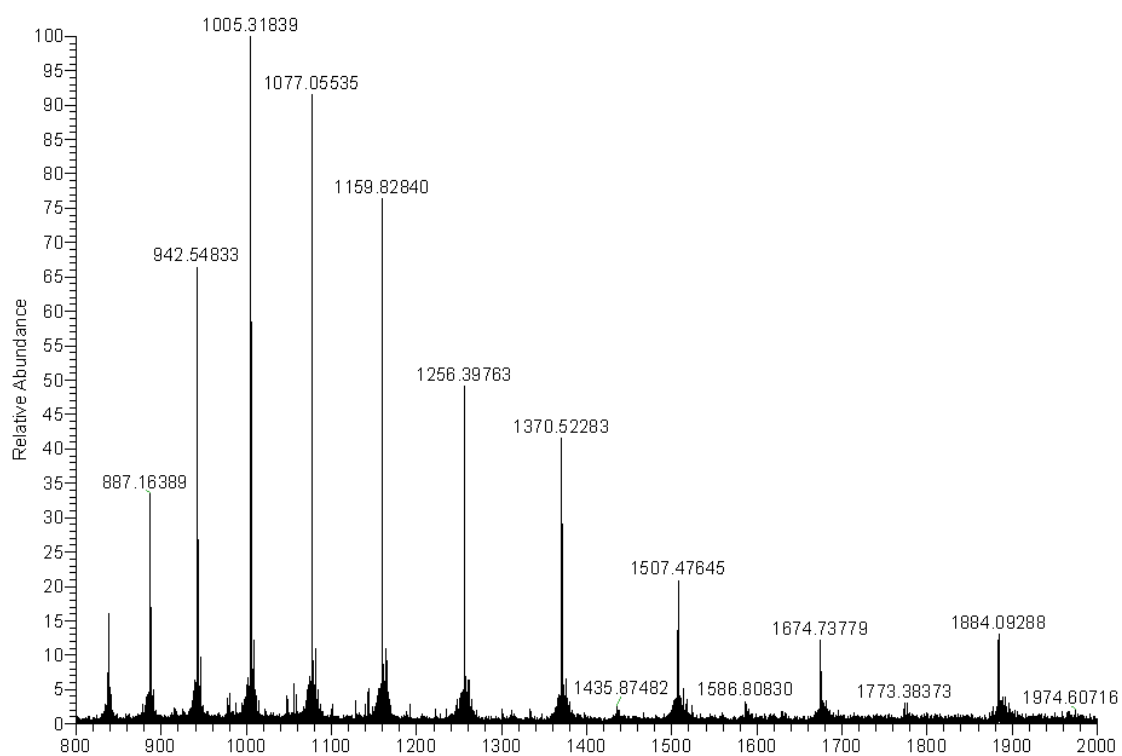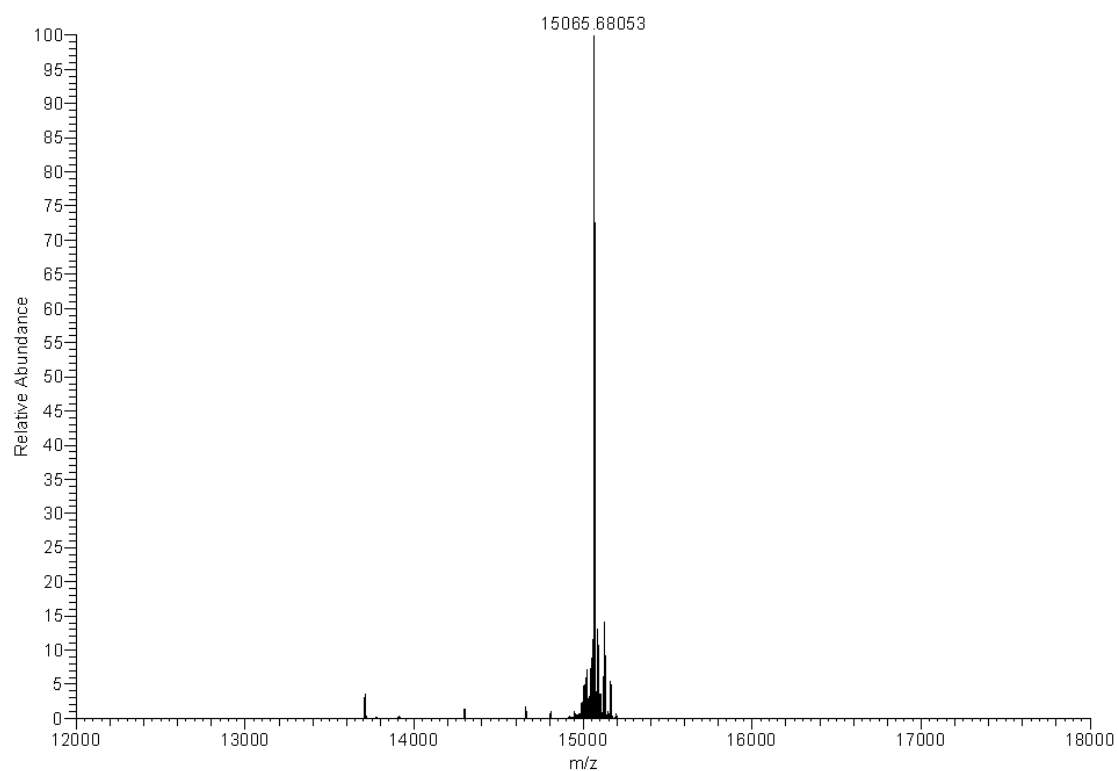

LmrR\_LM\_F93X calculated mass (-Met) 15049.72

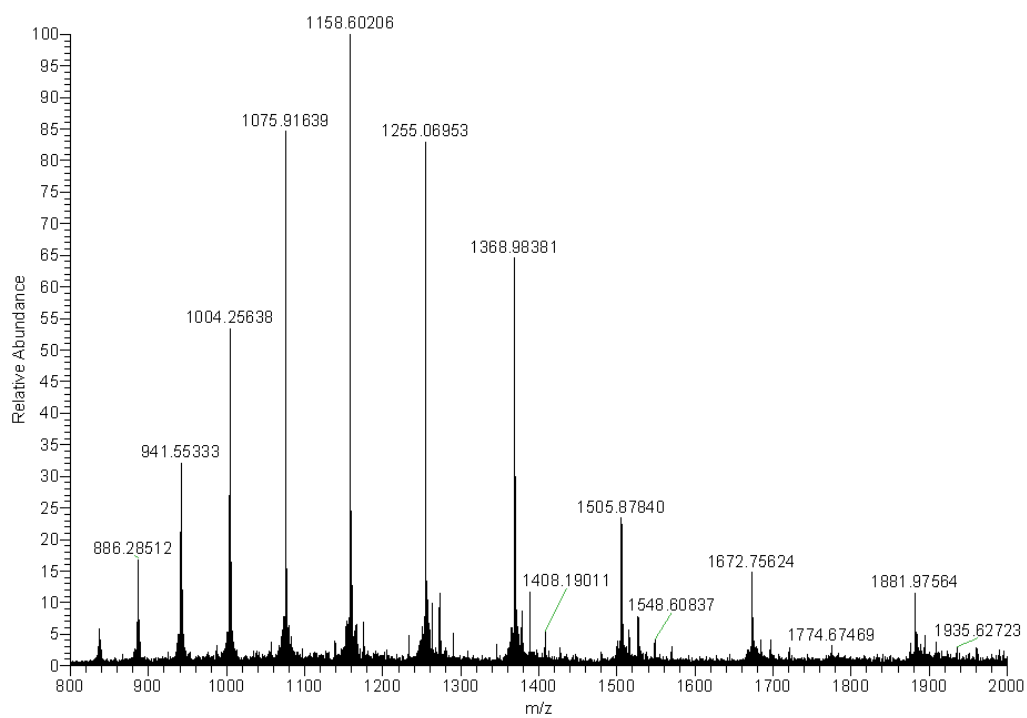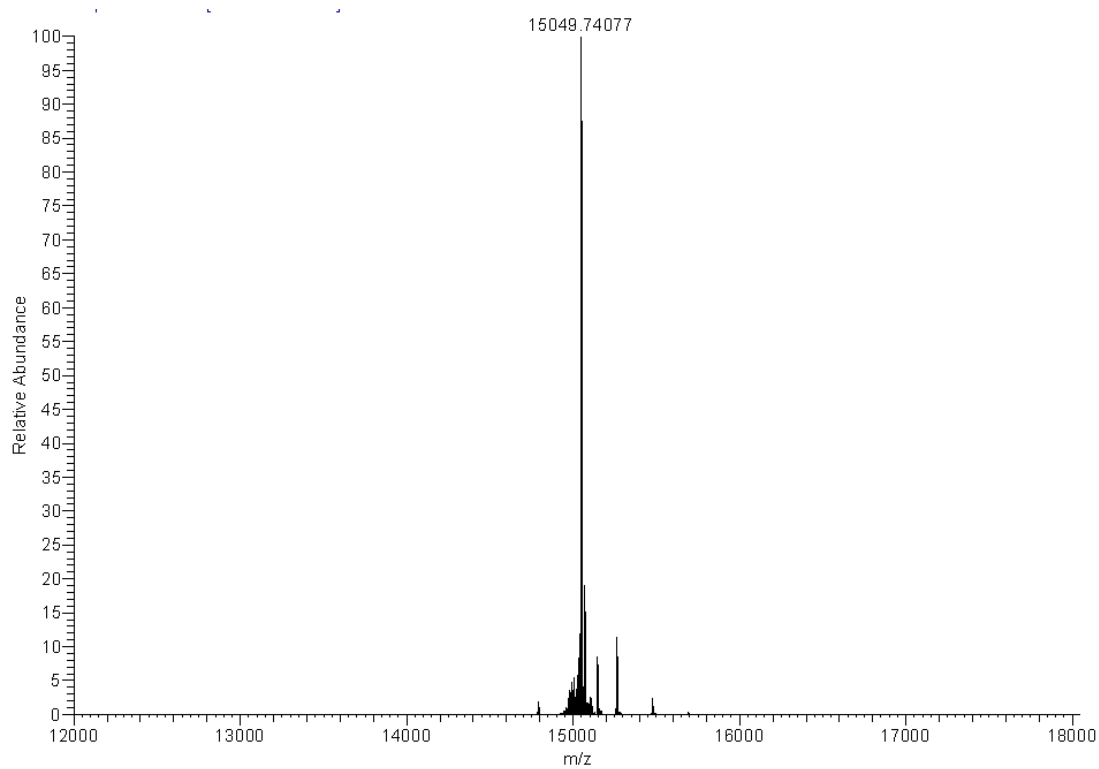

**LmrR\_LM\_M89X\_N19A** calculated mass (-Met) 15022.68

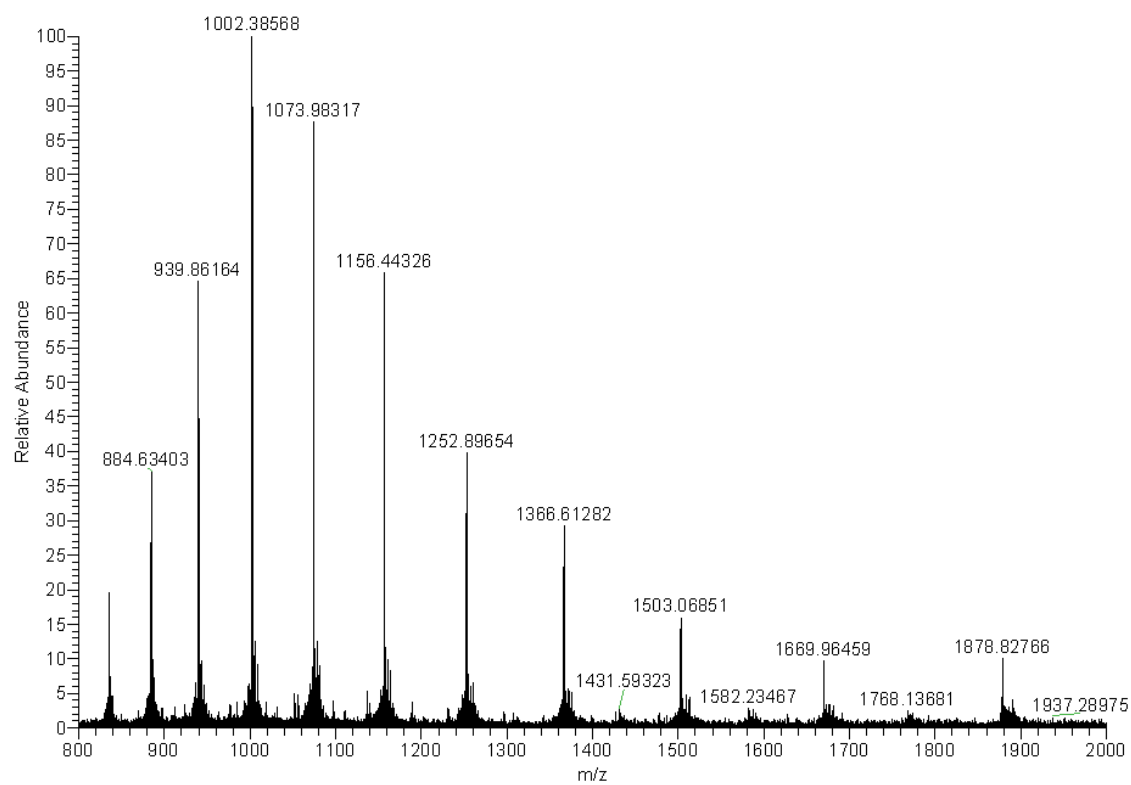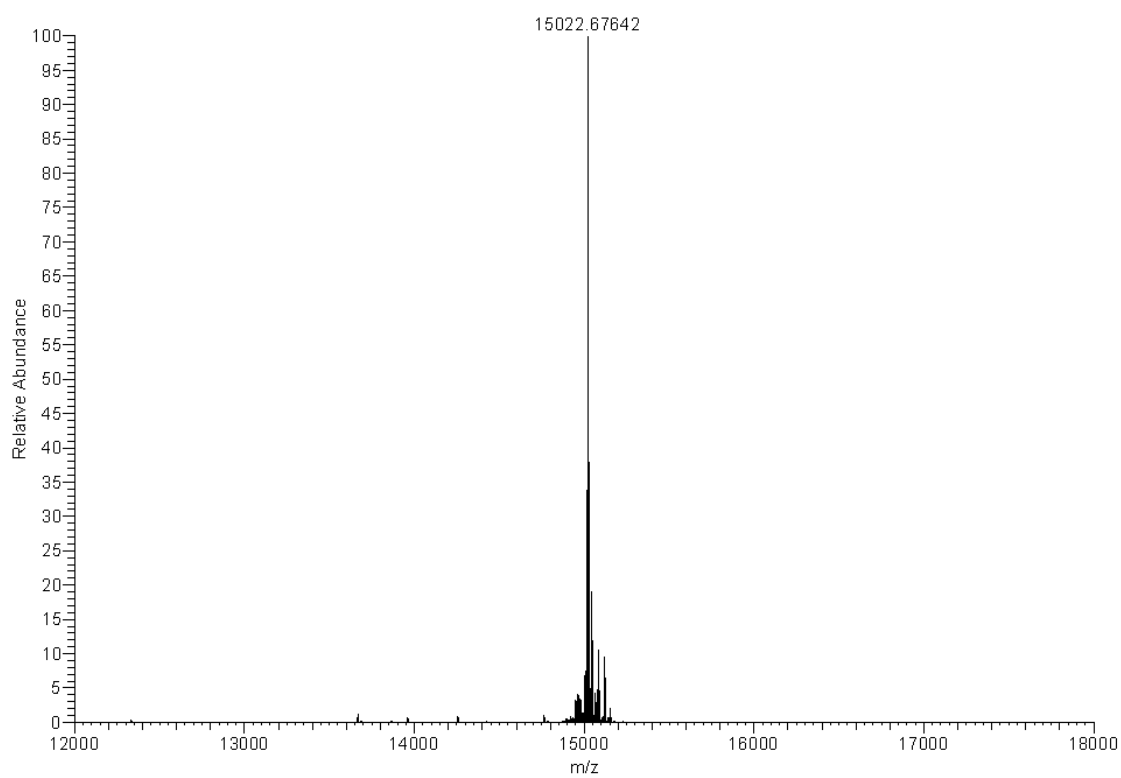

LmrR\_LM\_M89X\_K22A calculated mass (-Met) 15008.61

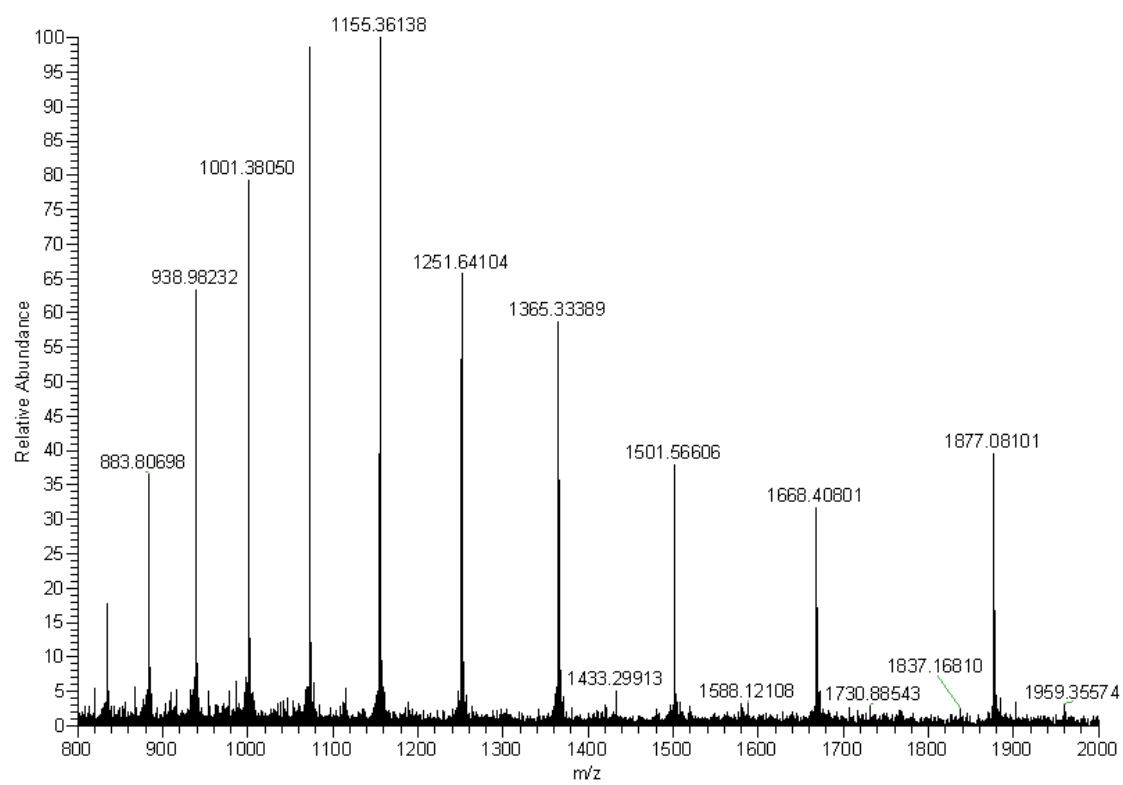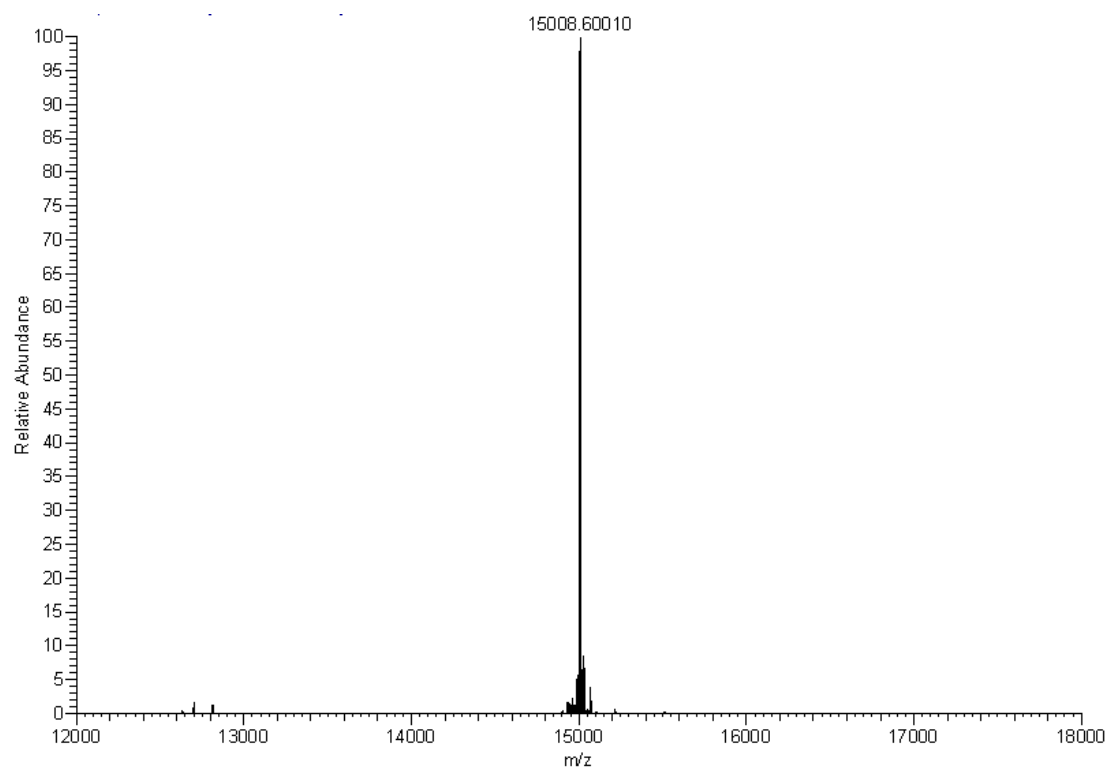

LmrR\_LM\_M89X\_H86A calculated mass (-Met) 14999.64

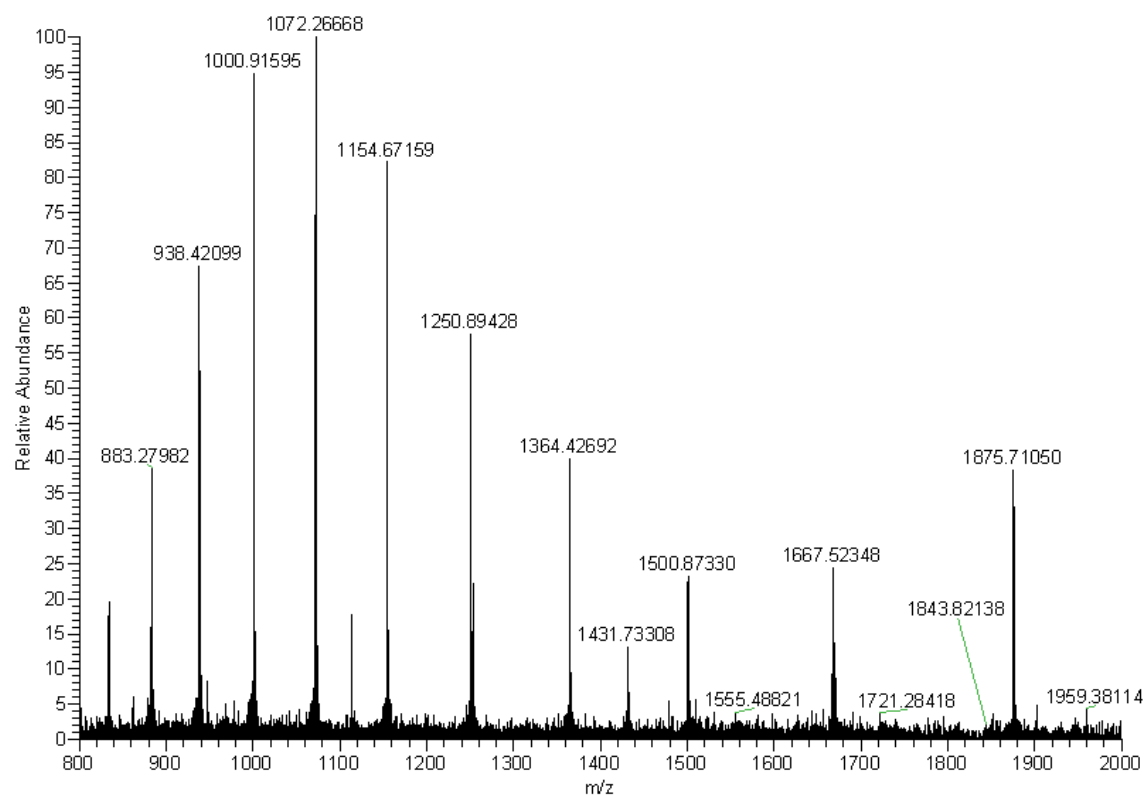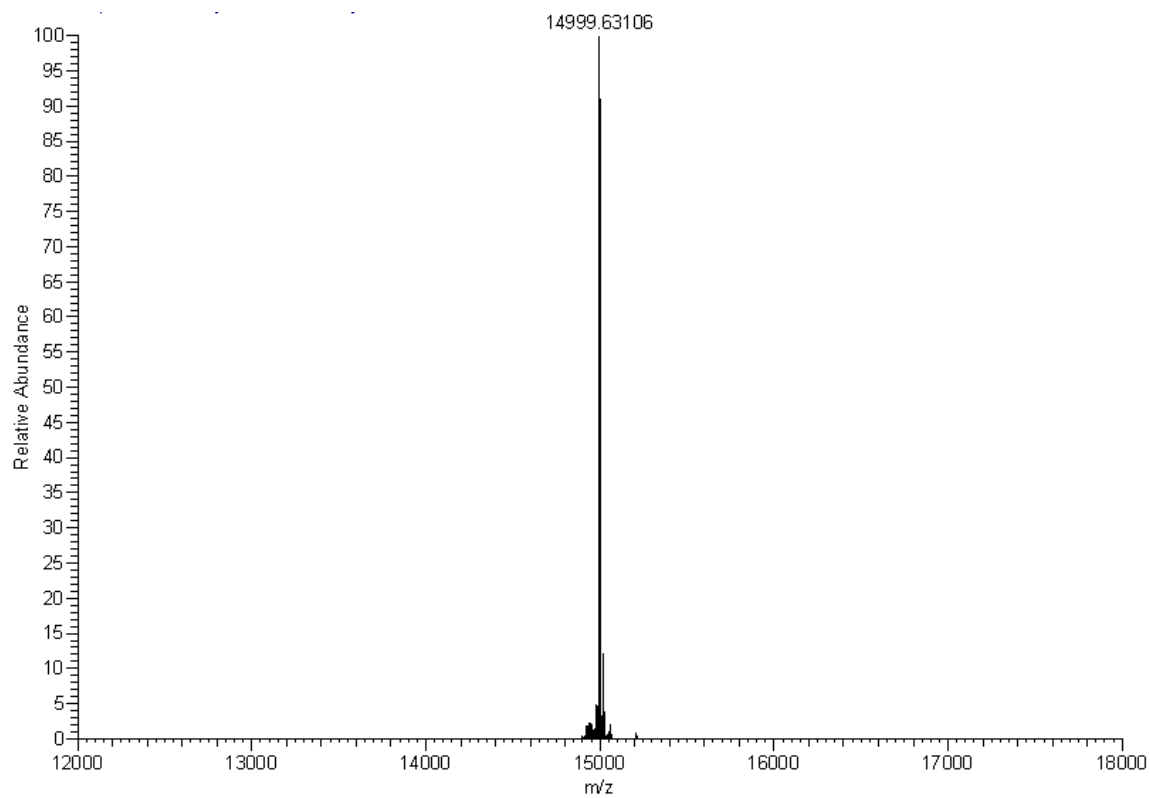

**LmrR\_LM\_M89X\_F93A** calculated mass (-Met) 14989.60

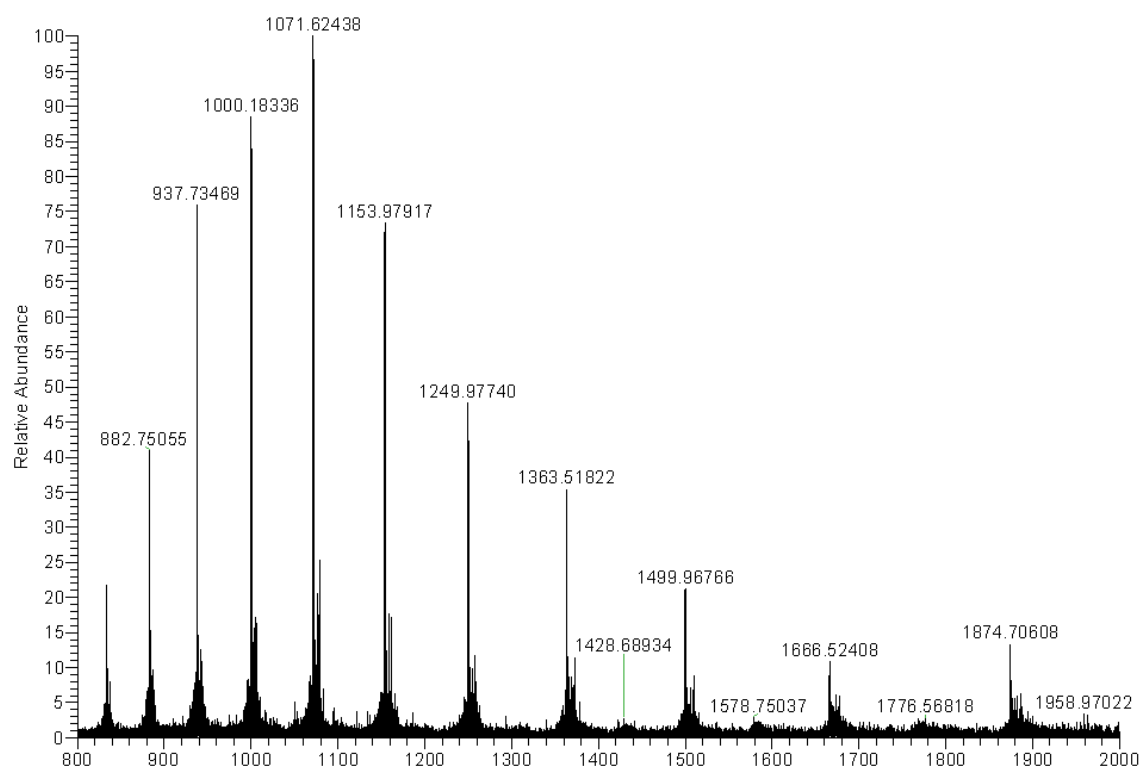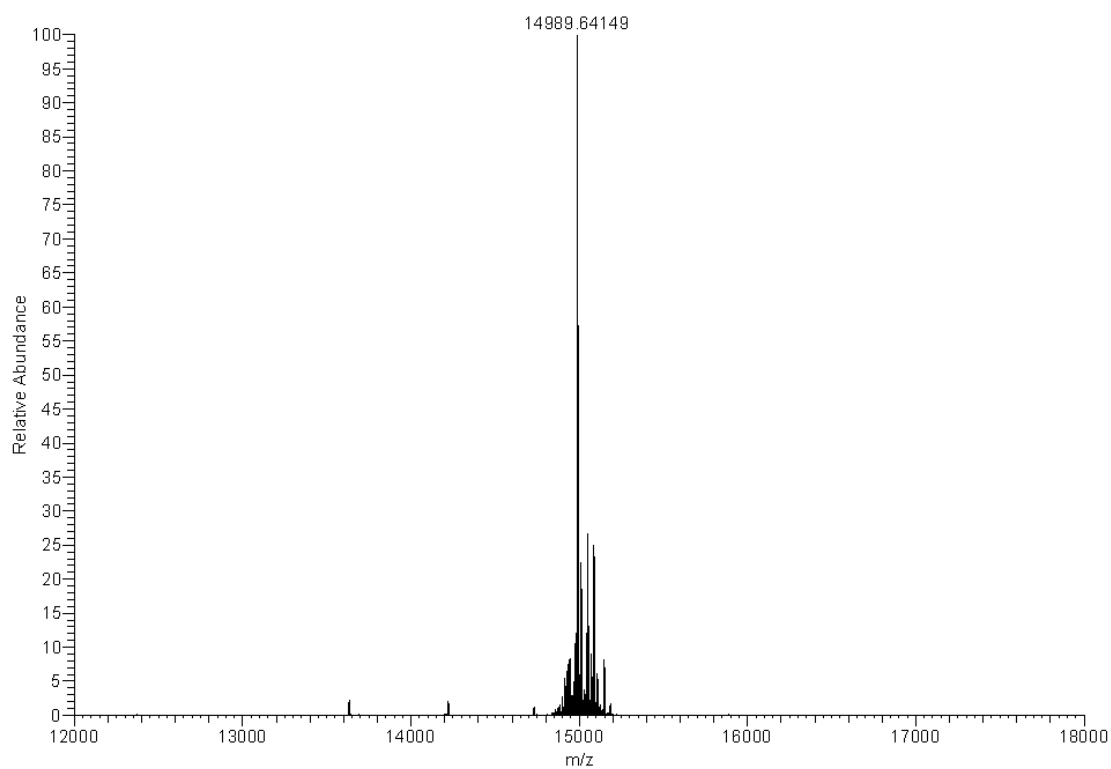

**LmrR\_LM\_M89X\_E107A** calculated mass (-Met) 15007.57

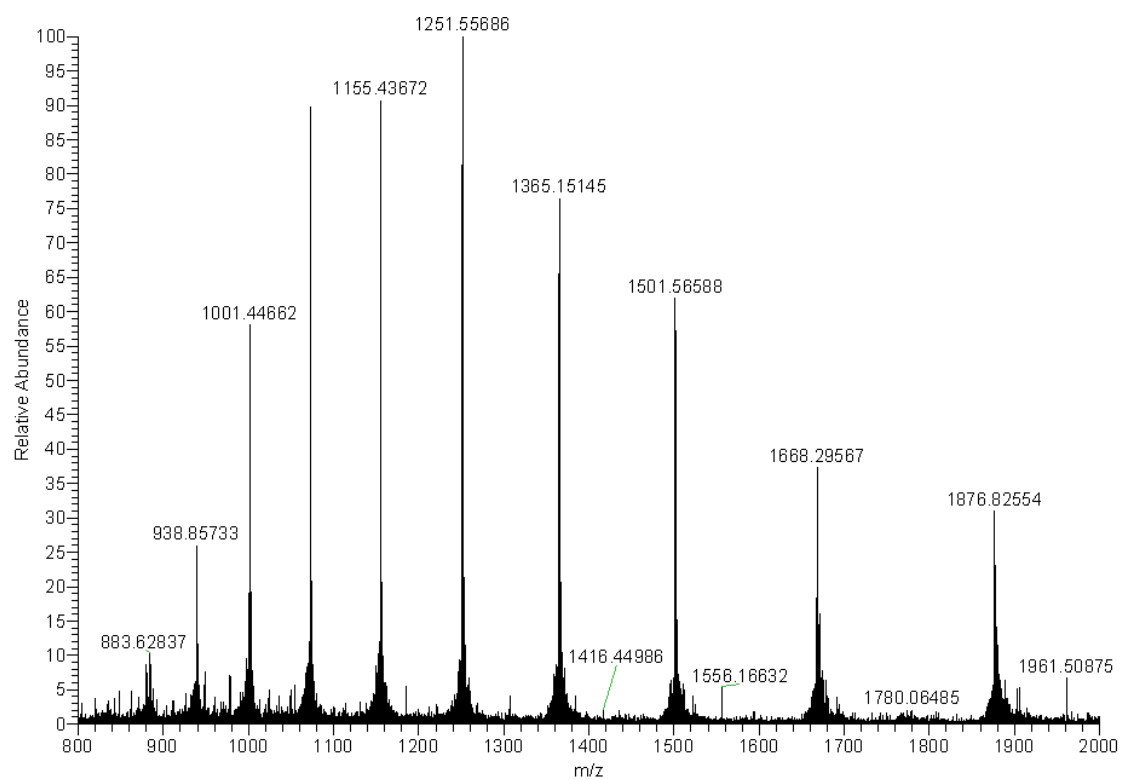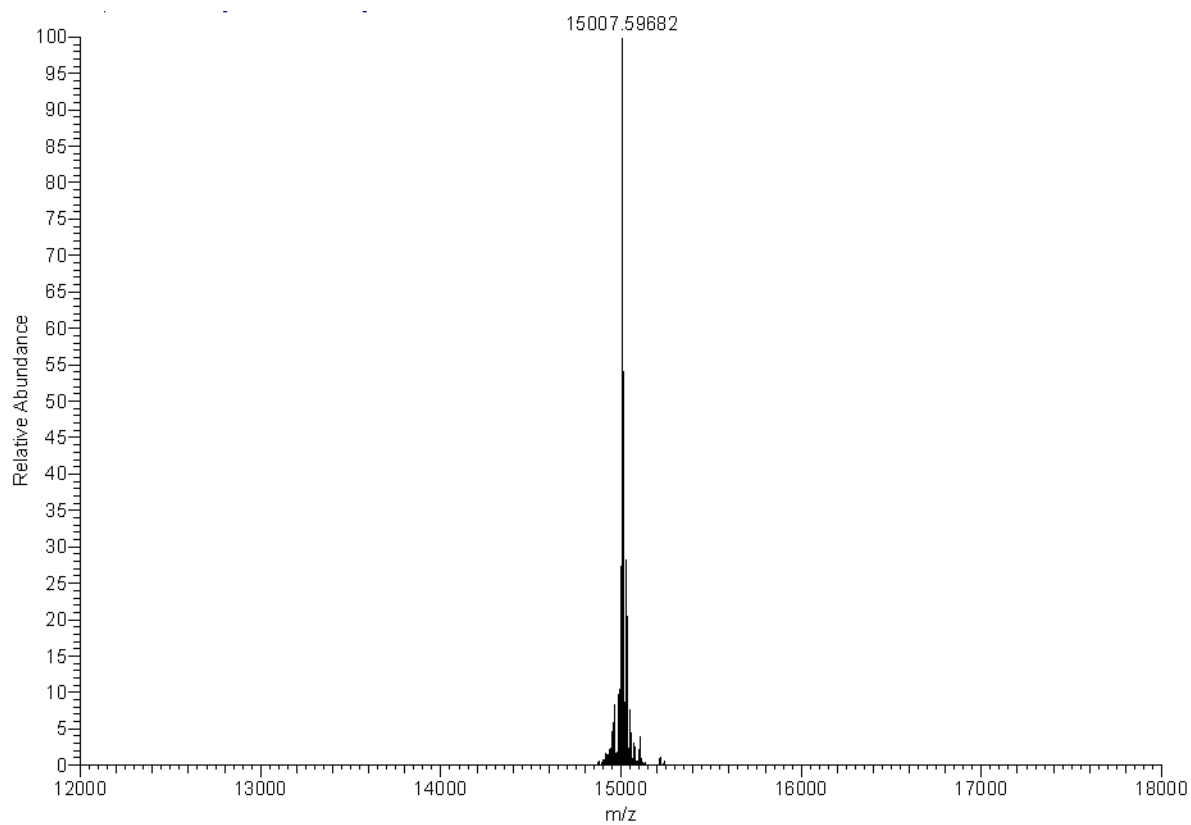

**LmrR\_LM\_M89X\_H86I** calculated mass (-Met) 15041.72

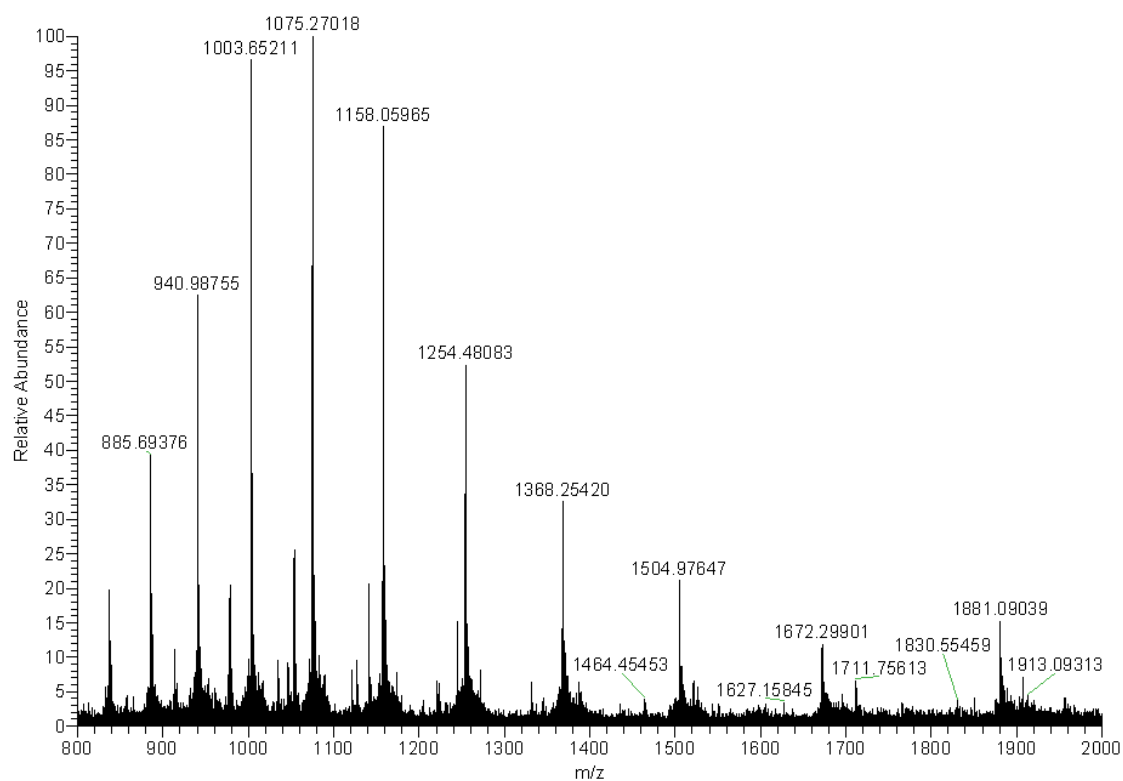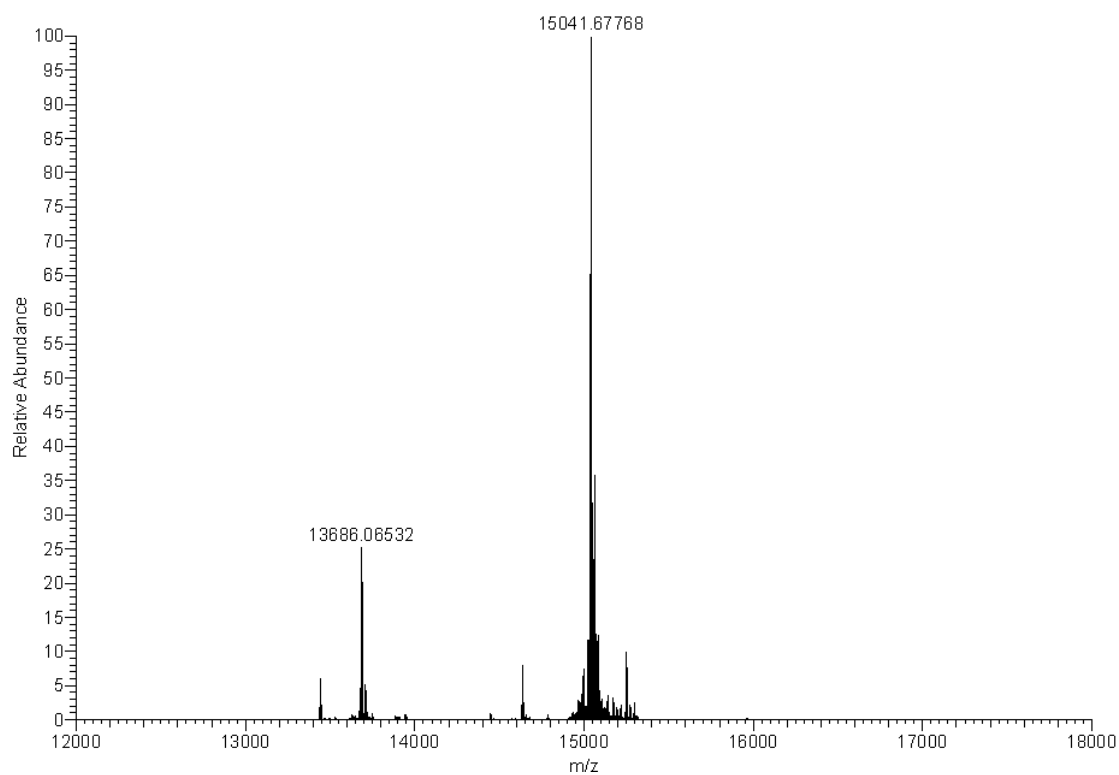

13686.06 – protein without terminal 13 amino acids ( GGSGG + Streptag)

LmrR\_LM\_M89X\_H86W calculated mass (-Met) 15114.77

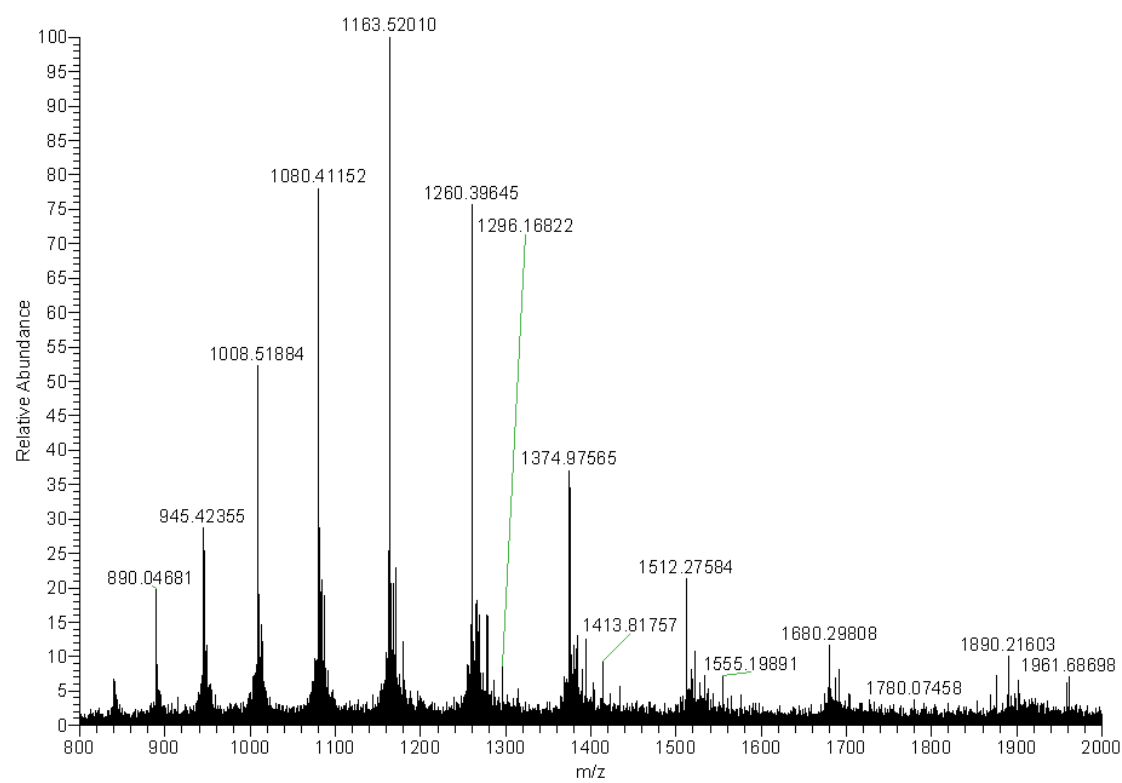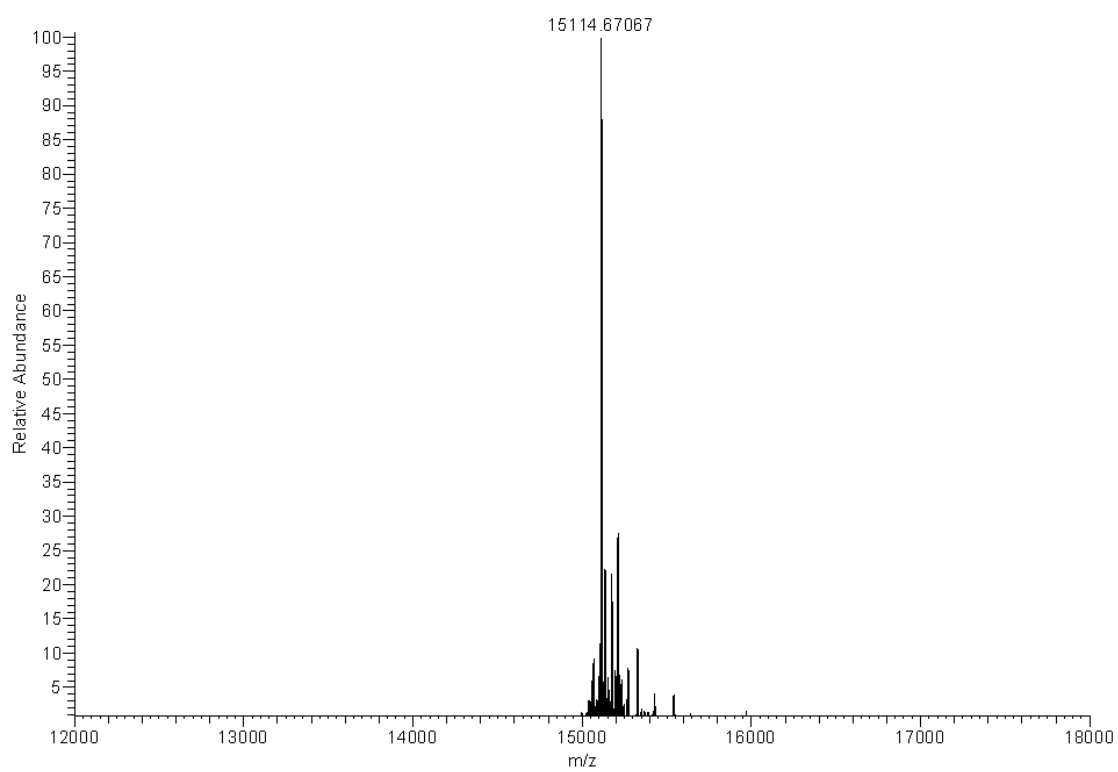

**LmrR\_LM\_M89X\_H86S** calculated mass (-Met) 15015.64

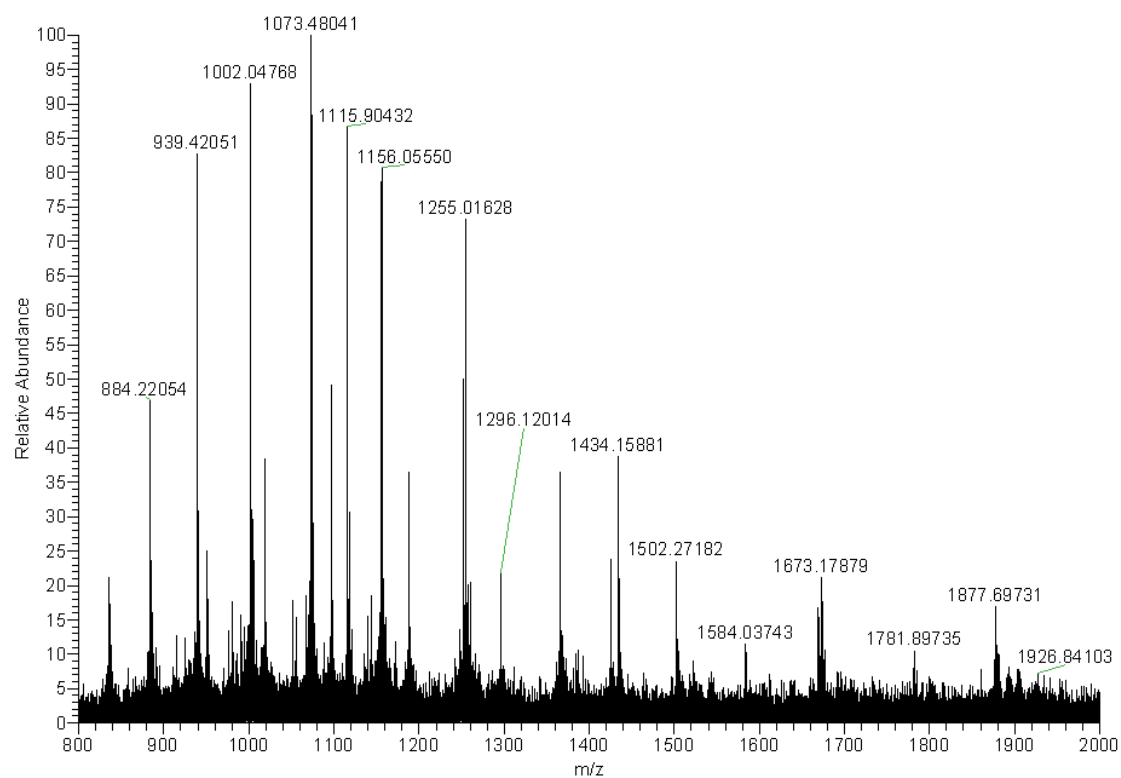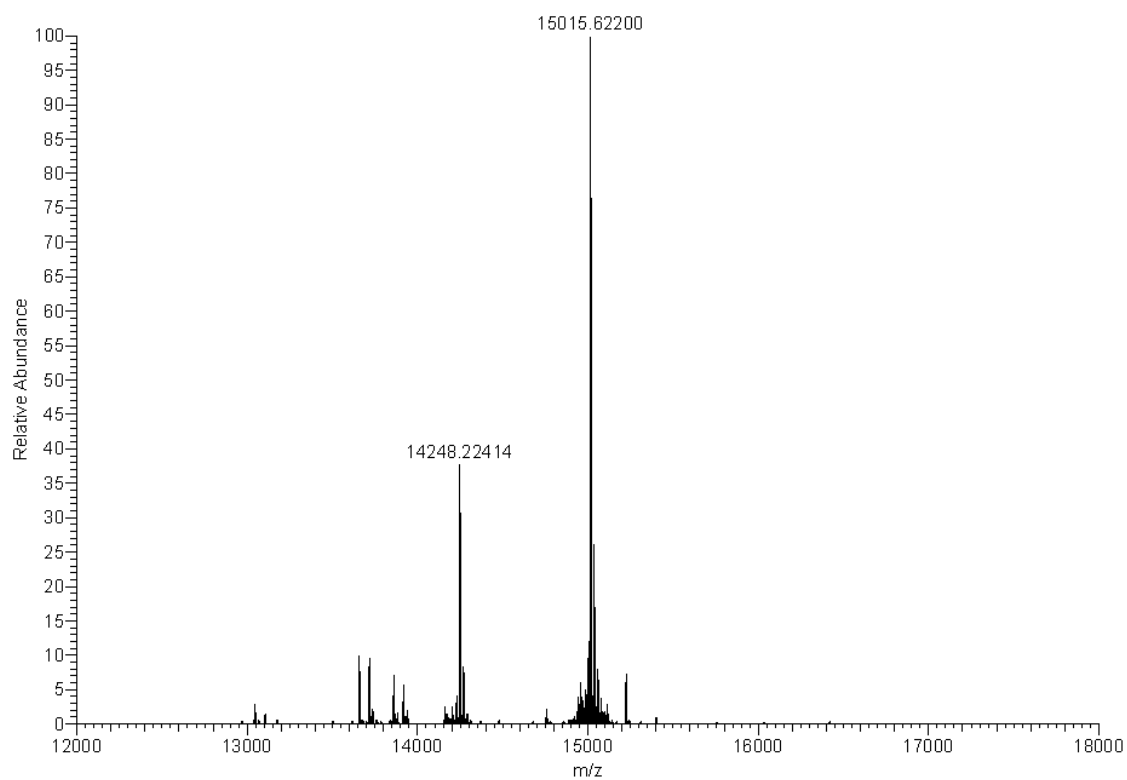

14248.22 – protein without terminal last 6 amino acids (6 out of 8 amino acids of Strep-tag)

**LmrR\_LM\_M89X\_H86D** calculated mass (-Met) 15043.65

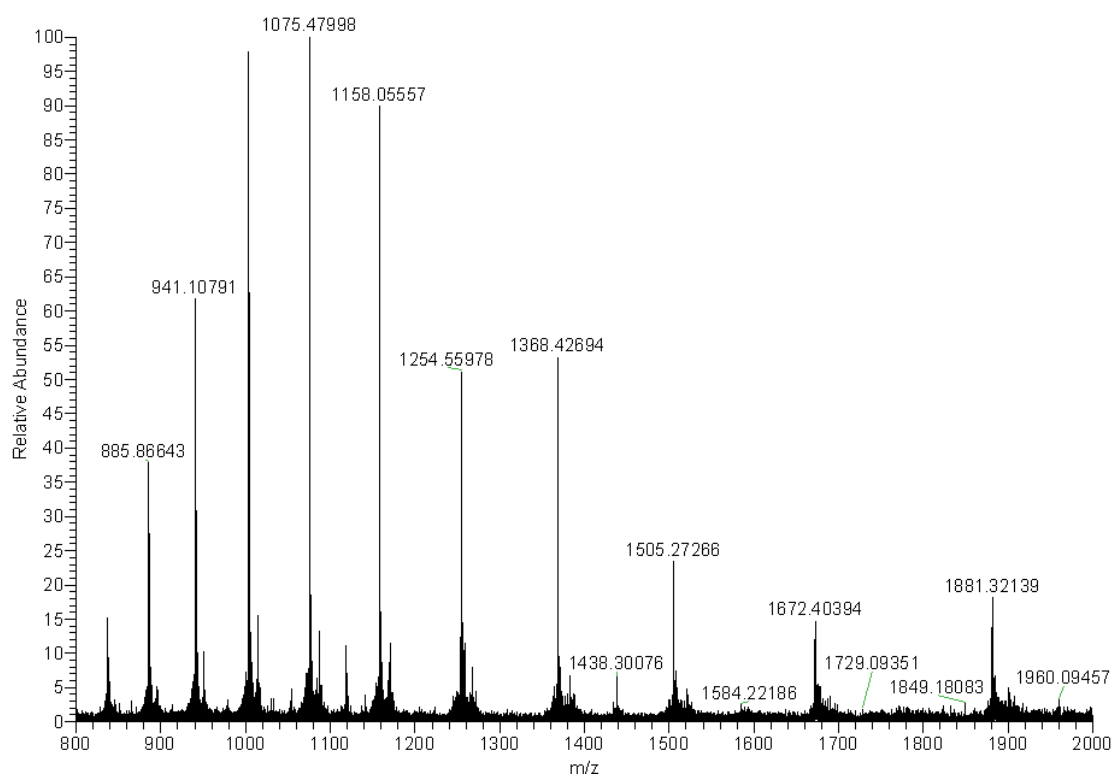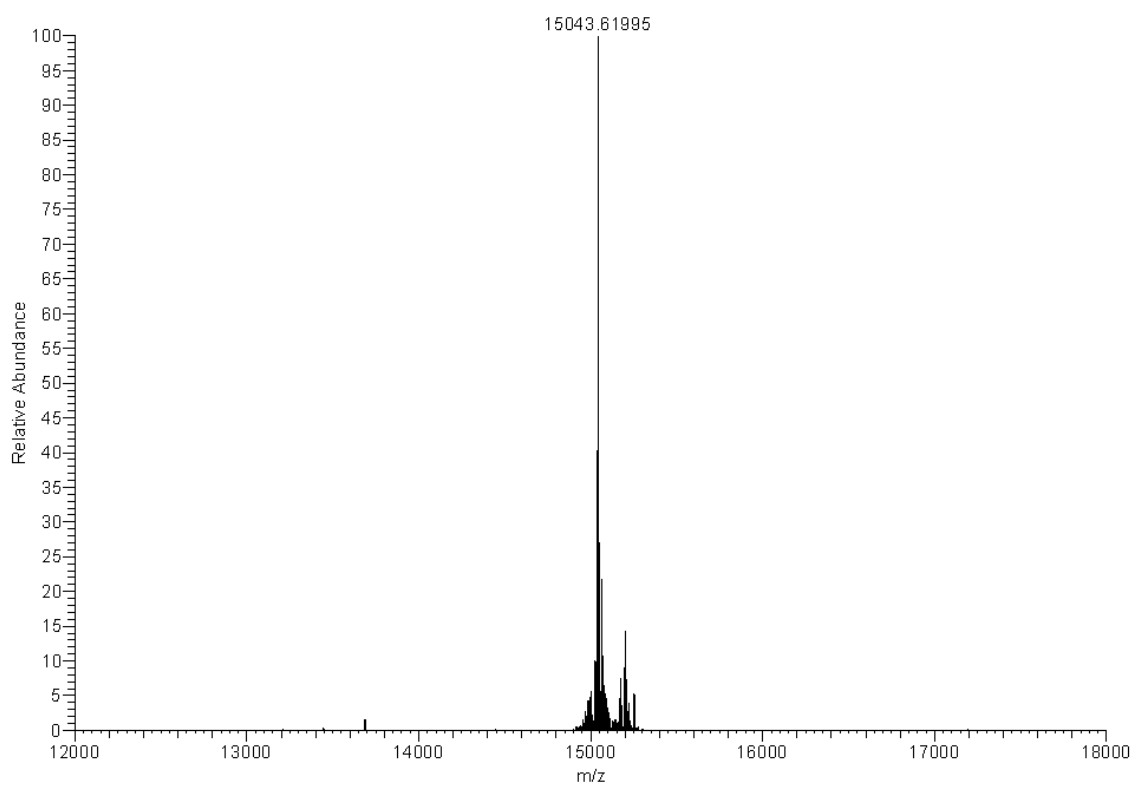

**LmrR\_LM\_M89X\_F93I** calculated mass (-Met) 15031.67

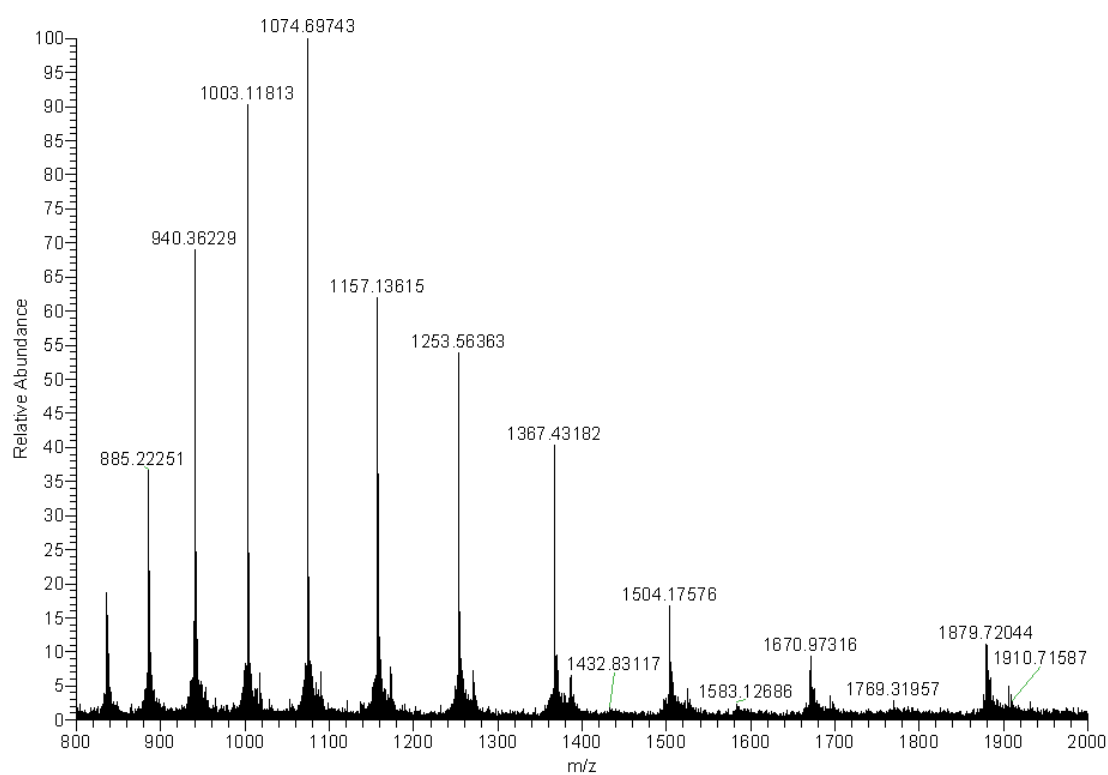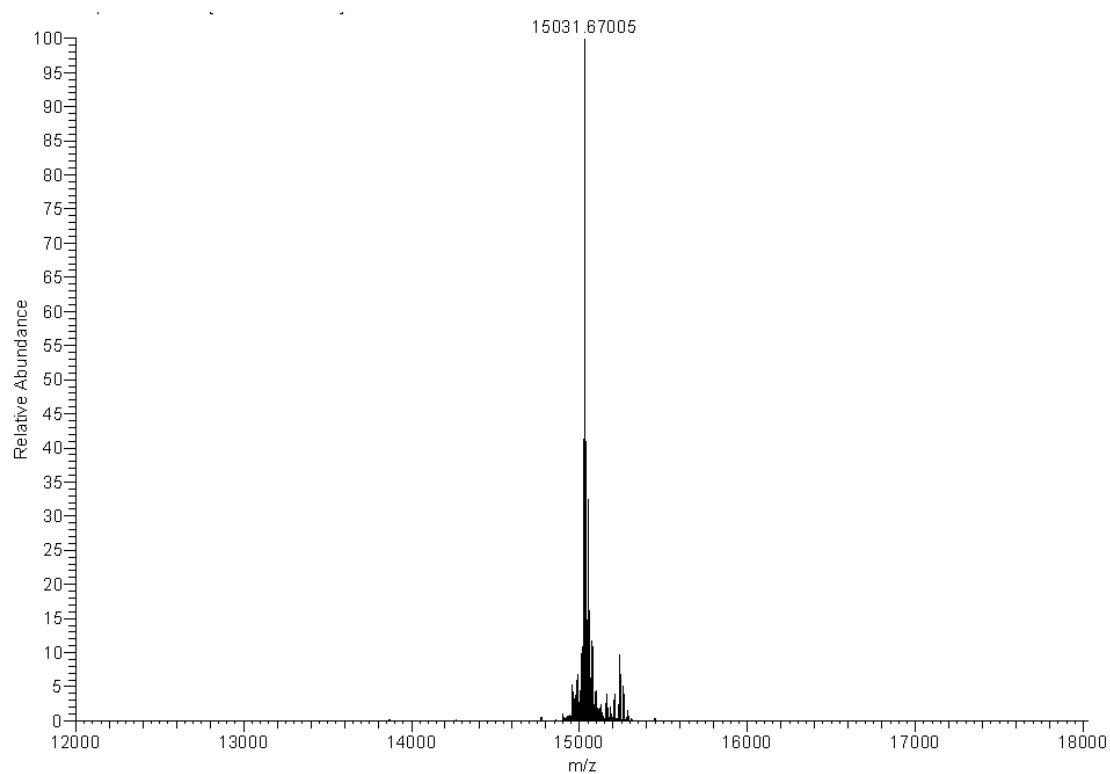

**LmrR\_LM\_M89X\_F93H** calculated mass (-Met) 15055.67

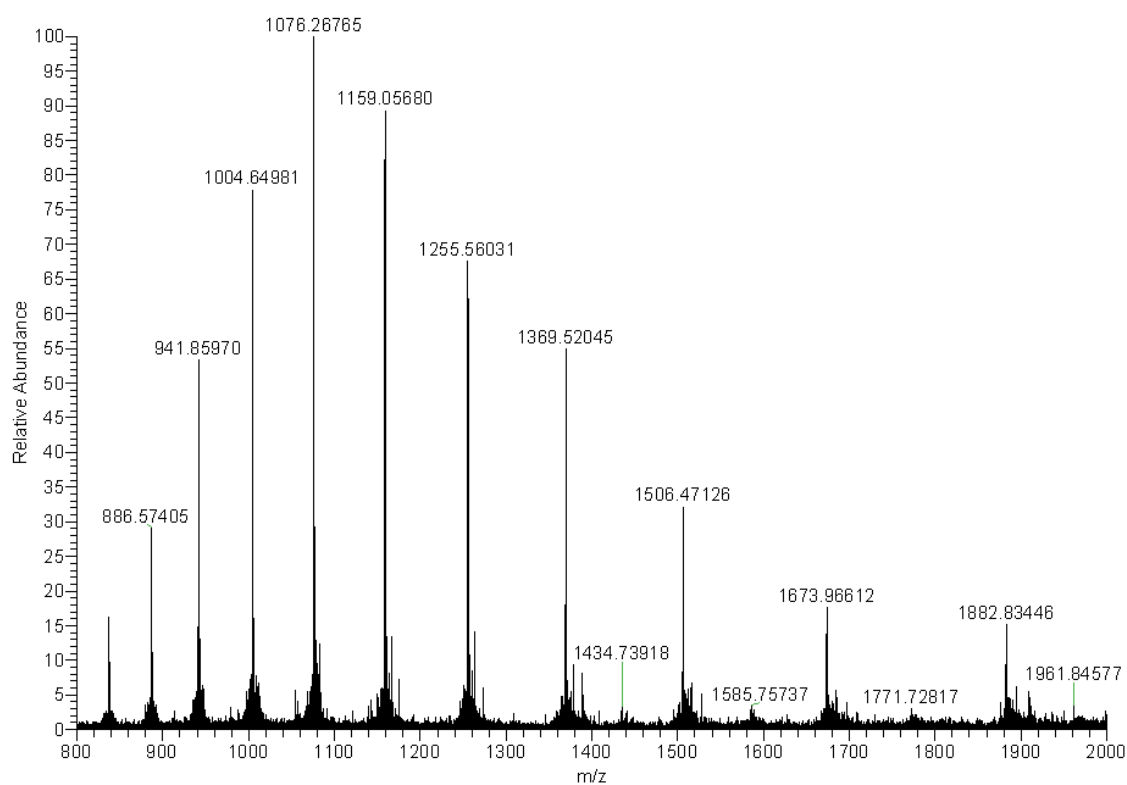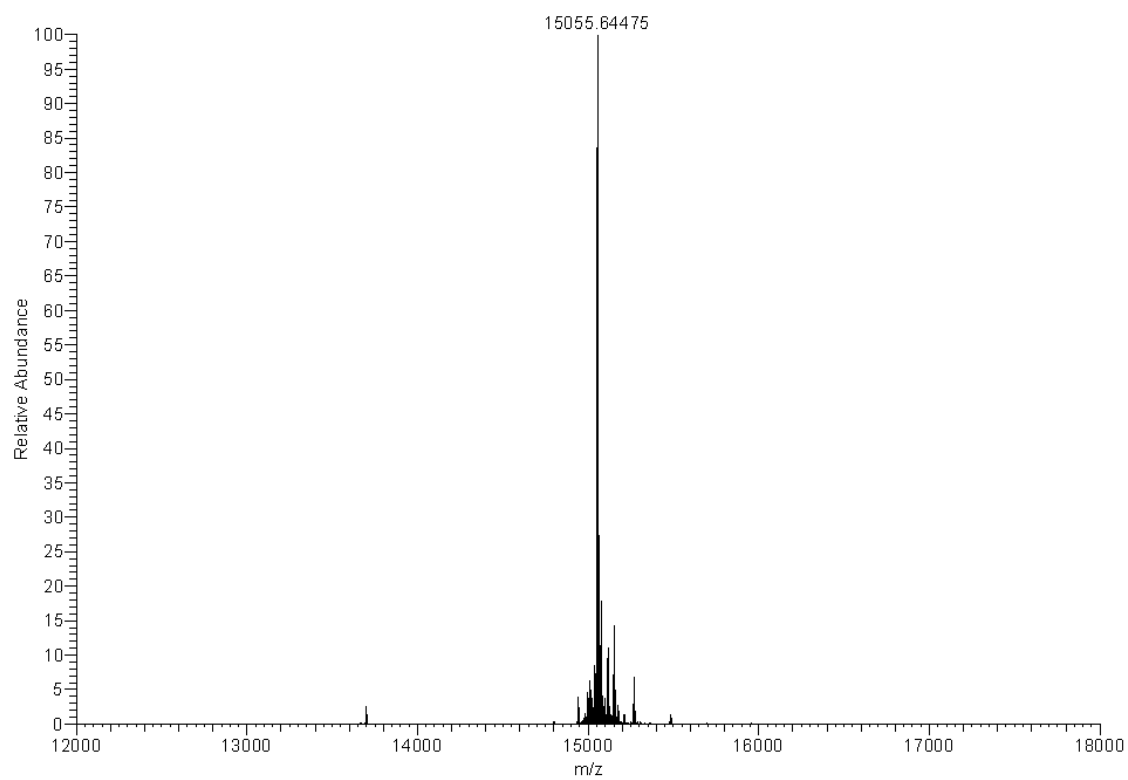

**LmrR\_LM\_M89X\_F93W** calculated mass (-Met) 15104.74

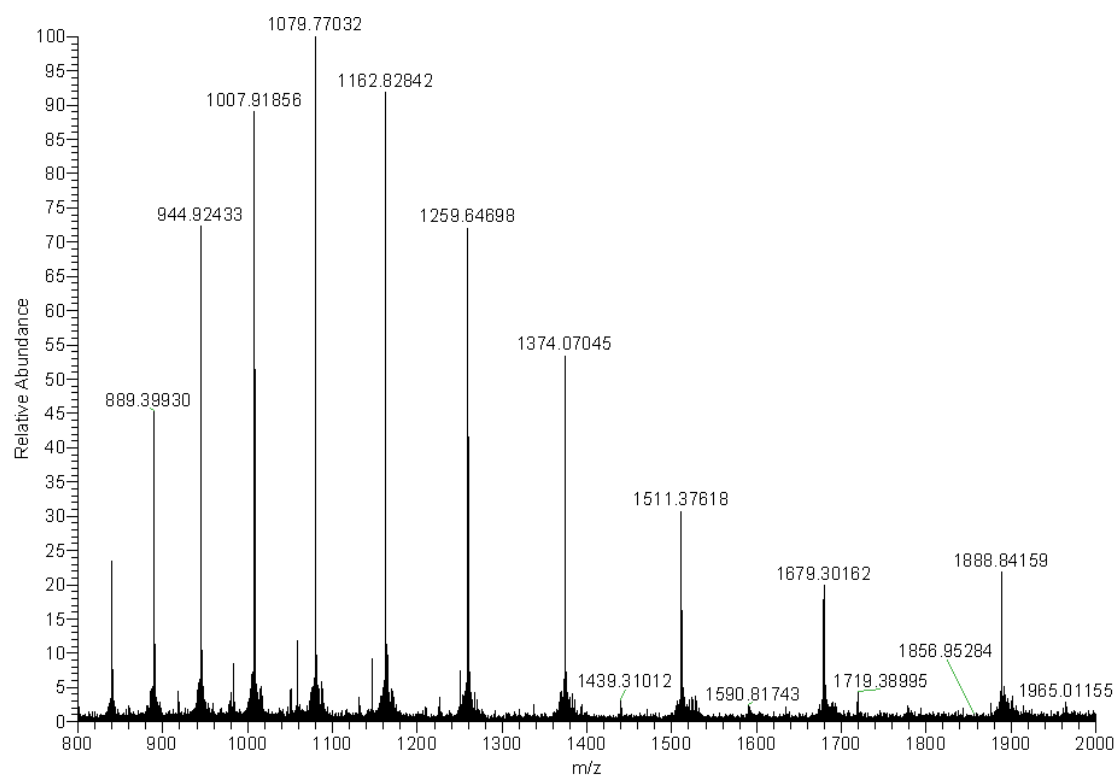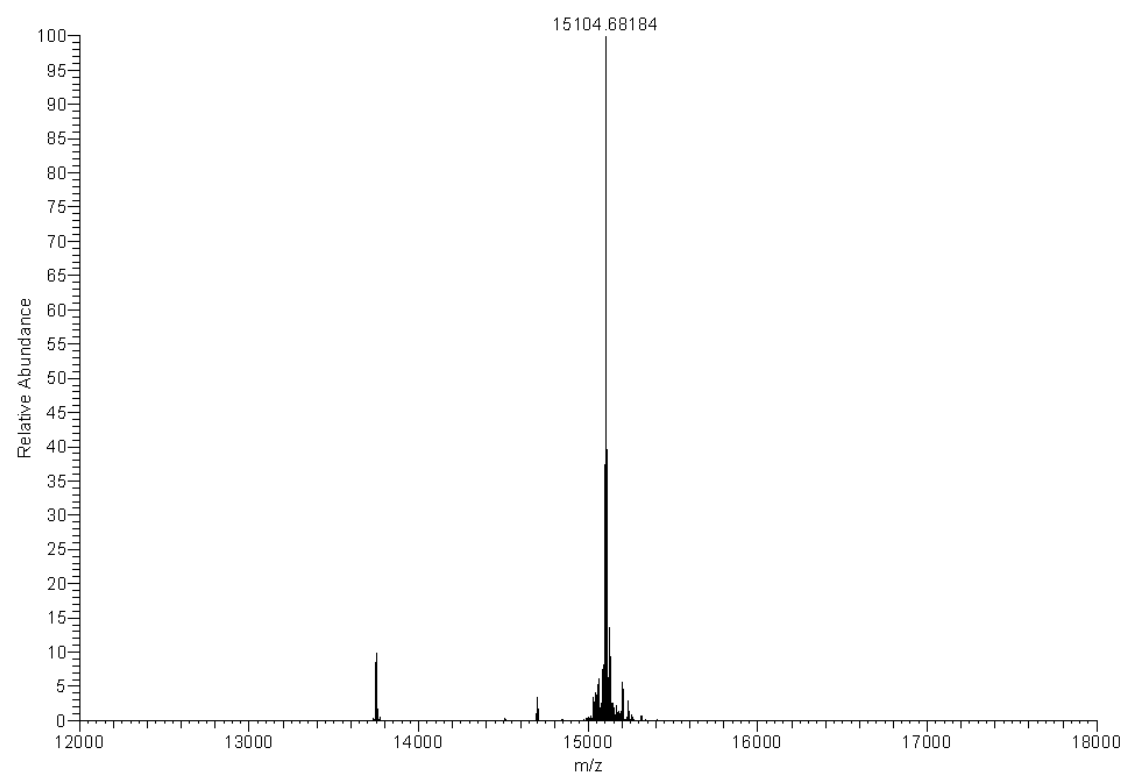

**LmrR\_LM\_M89X\_F93D** calculated mass (-Met) 15033.61

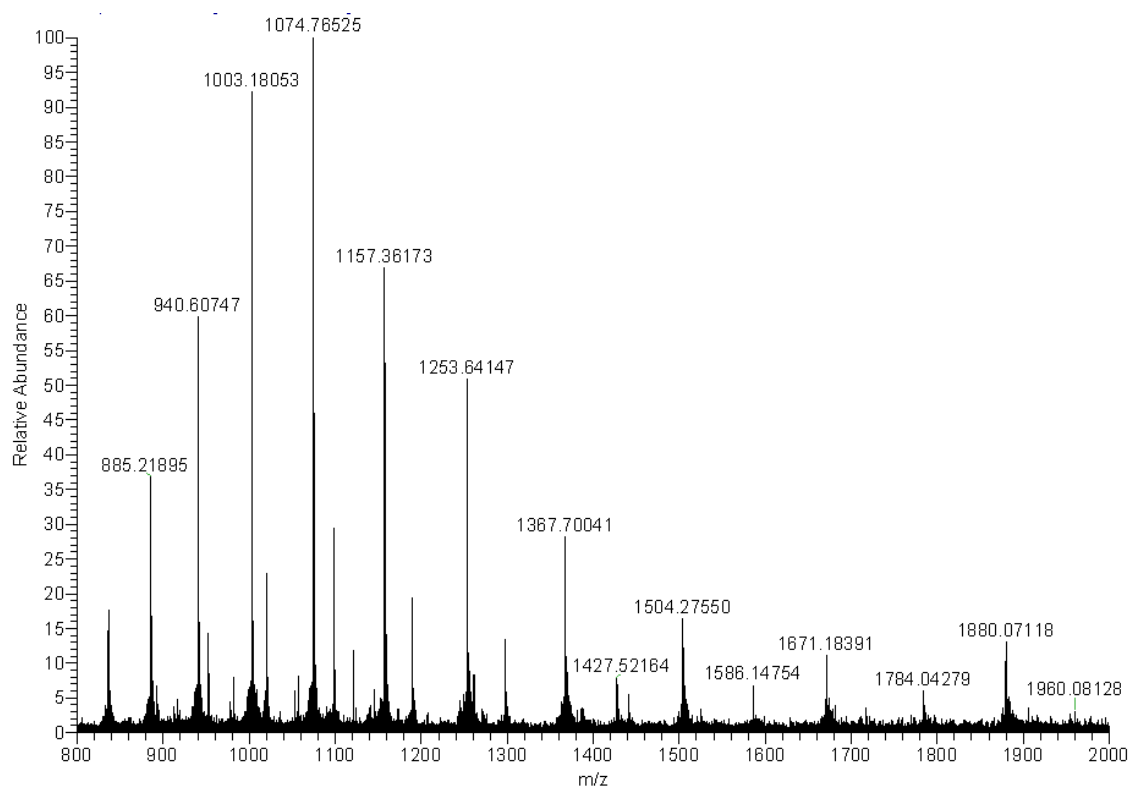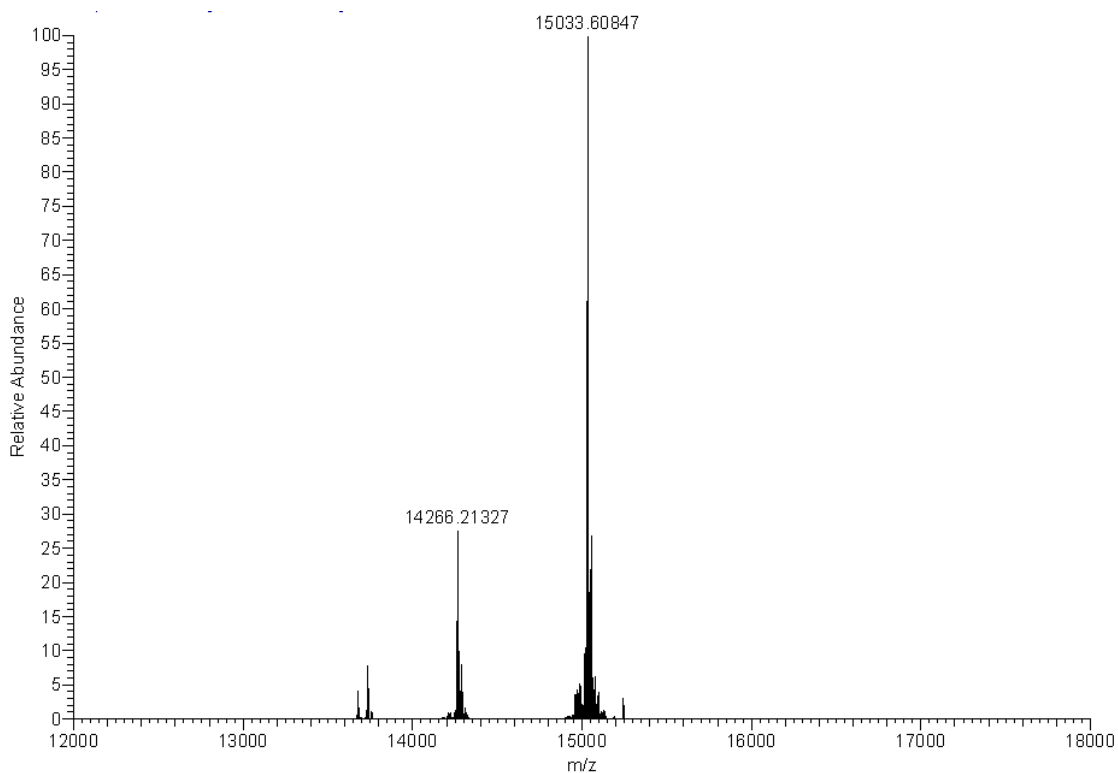

14266.21 – protein without terminal last 6 amino acids (6 out of 8 amino acids of Strep-tag)

**LmrR\_LM\_M89X\_N19A\_E107A** calculated mass (-Met) 14964.55

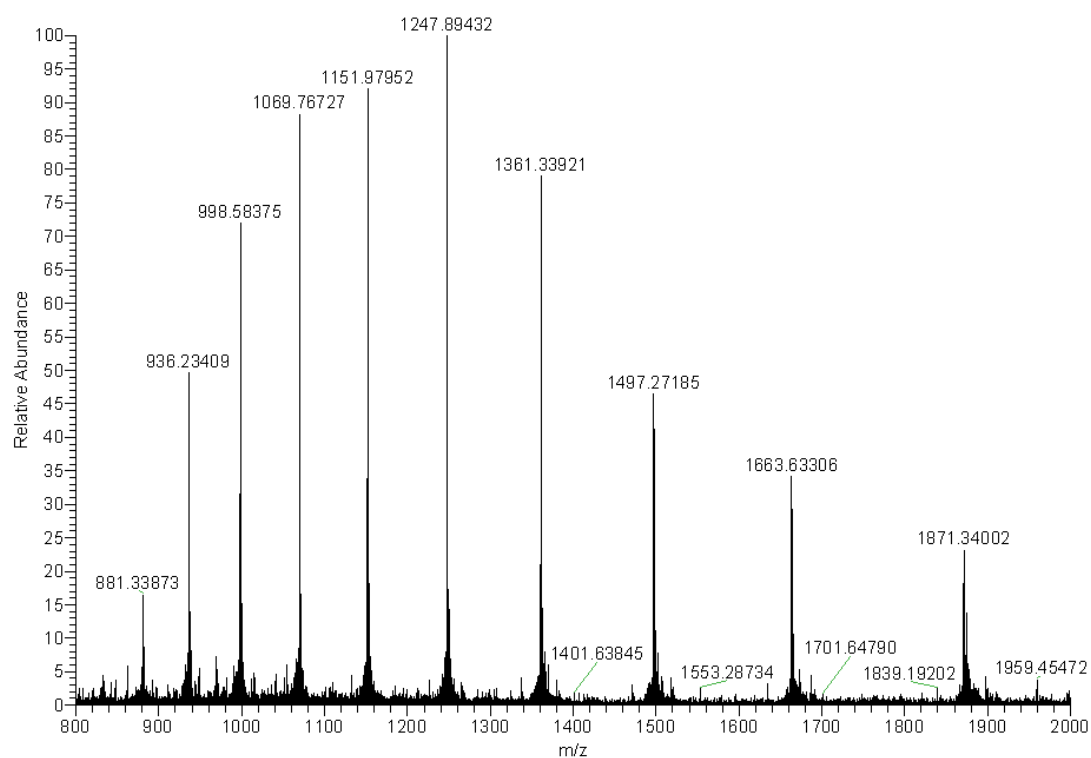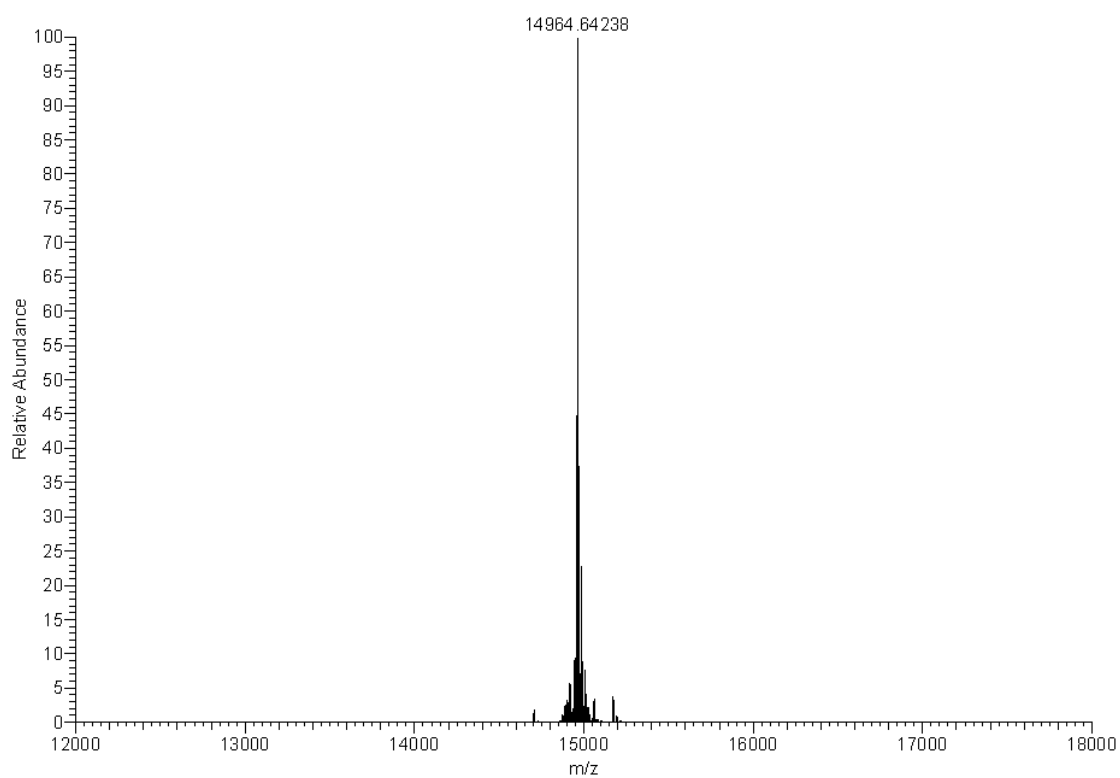

LmrR\_LM\_M89X\_H86A\_E107A calculated mass (-Met) 14941.60

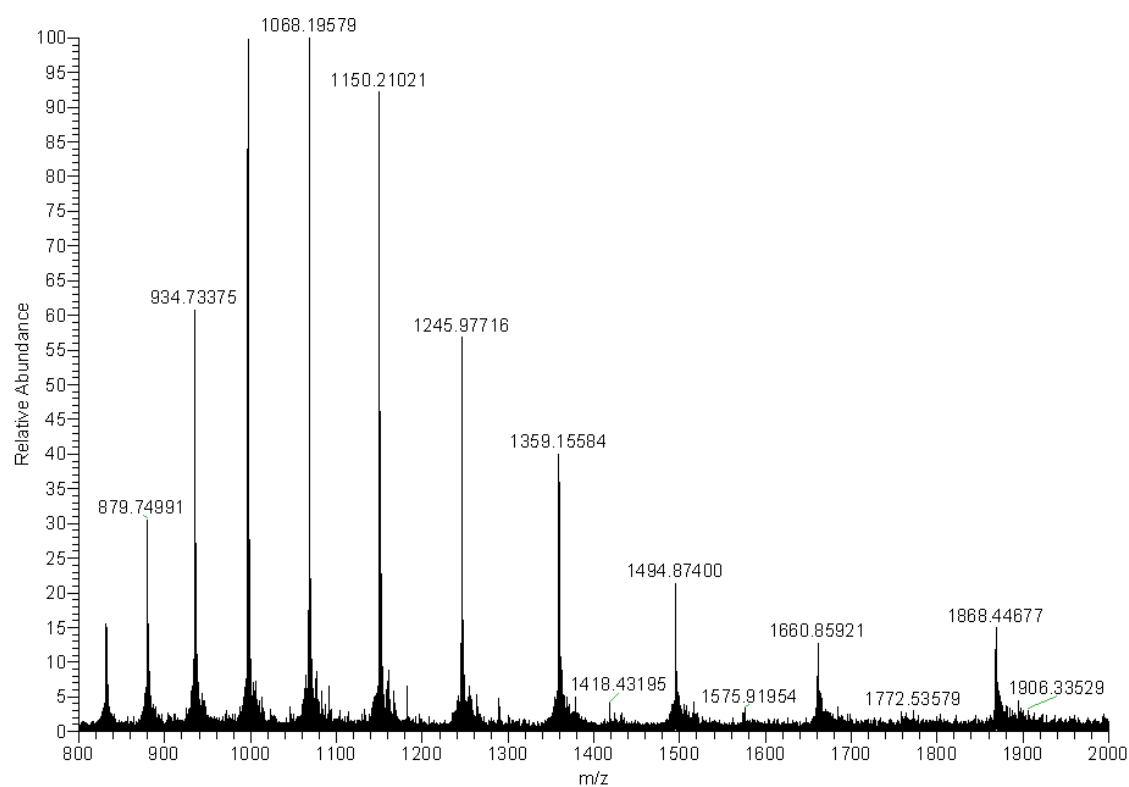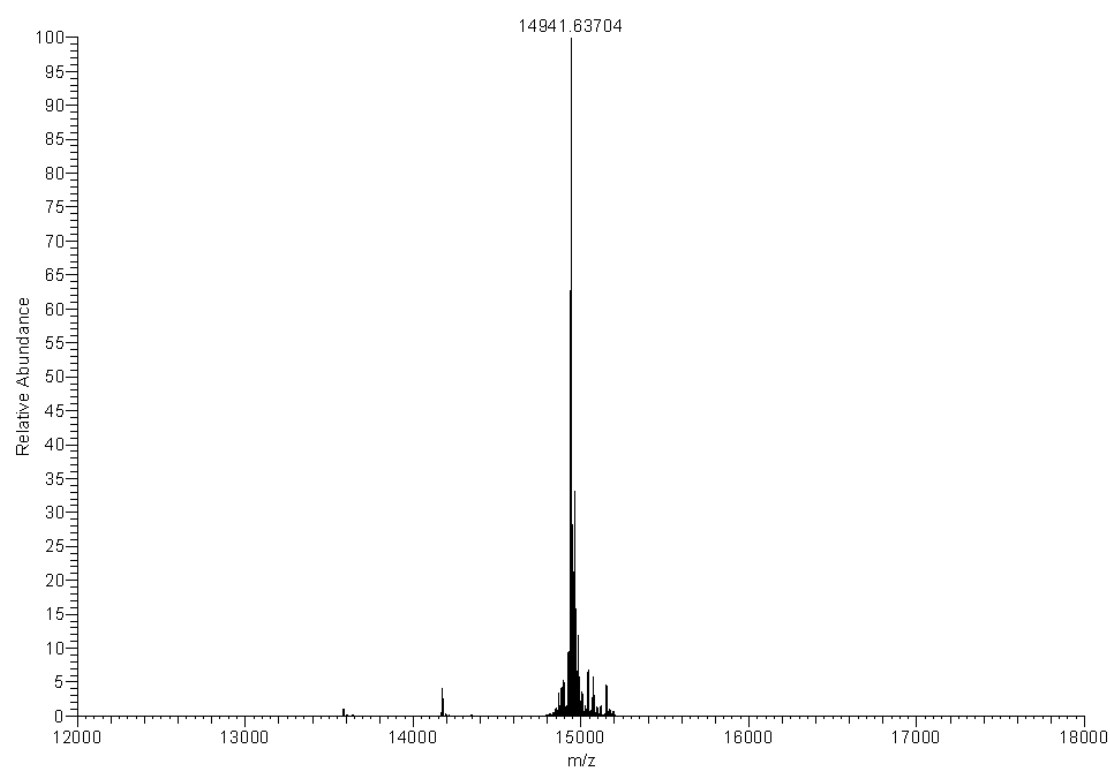

## 8. Characterization of the binding of Cu(II) to BpyAla

### I. UV-VIS spectroscopy

**Figure S4.** **a)** Absorption Spectra of BpyAla after addition of different concentrations of  $\text{Cu}(\text{NO}_3)_2$  of  $\text{Cu}(\text{NO}_3)_2$ . **b)** Absorption spectra of LmrR (M89) after addition of different concentrations

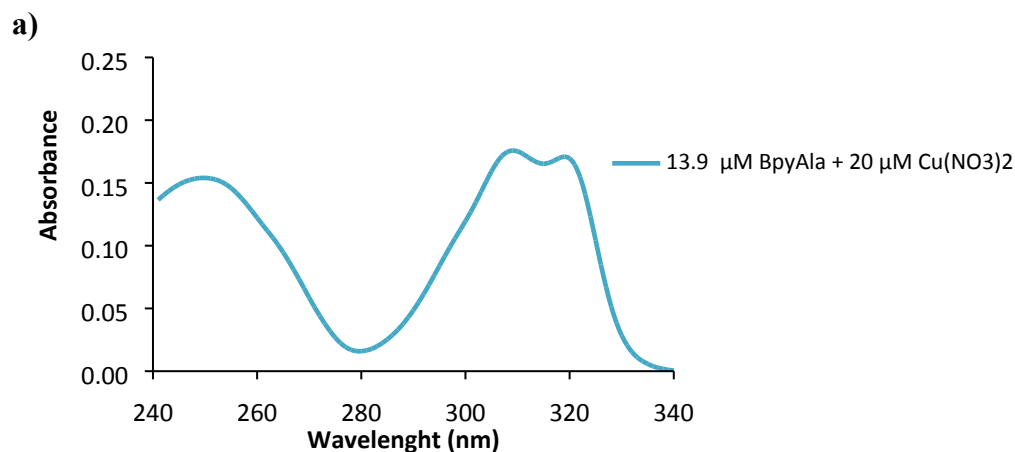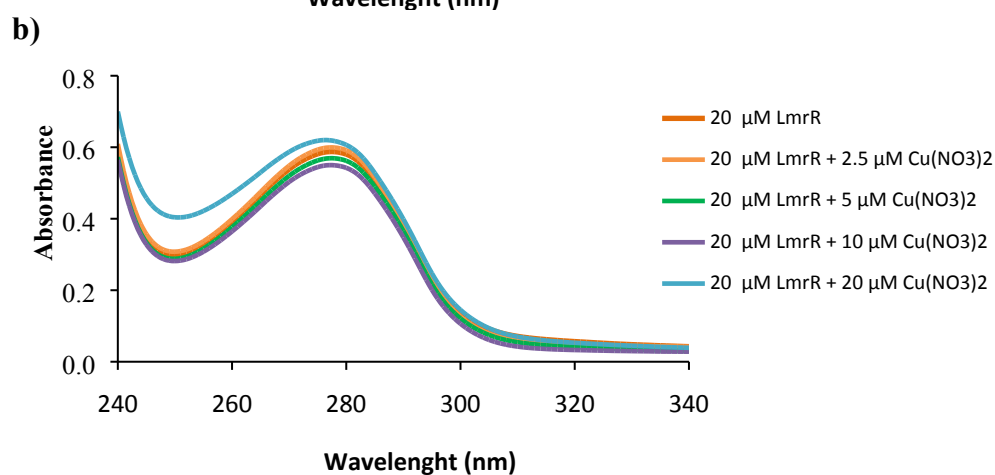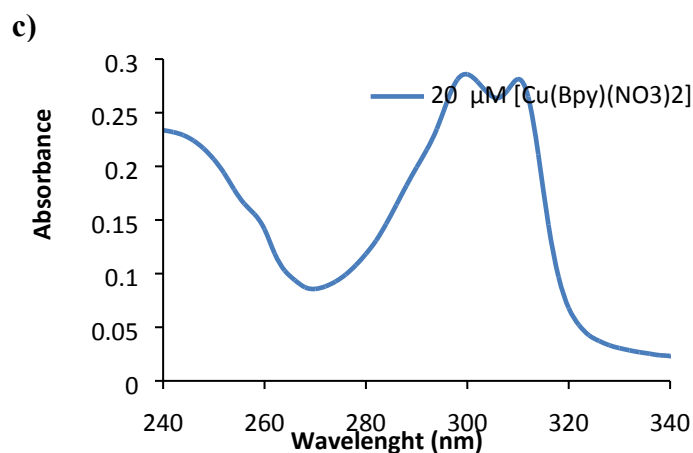

## II. Raman spectroscopy

### *Experimental procedure of Raman spectroscopy measurement*

Raman spectra were obtained in a ca. 155° backscattering arrangement with excitation at 355 nm (10 mW, Cobolt Zouk). Raman scattering was collected and collimated (plano-convex, dia. 25 mm,  $f = 7.5$  cm), passed through a long pass filter to reject Rayleigh scattering (Semrock) and subsequently refocused (plano-convex, dia. 25 mm,  $f = 17.5$  cm) into and dispersed by a Shamrock500i spectrograph (Andor Technology) with a 2400 l/mm blazed at 300 nm and acquired with a DV420A-BU2 CCD camera (Andor Technology). Data were recorded and processed using Solis (Andor Technology), Spekwin32<sup>5</sup> and Spectrum (Perkin Elmer) with spectral calibration performed using the Raman spectrum of acetonitrile/toluene 50:50 (v:v).<sup>6</sup> Samples were held in 10 mm path length quartz cuvettes. Solvent subtraction and a multipoint baseline correction were performed for all spectra.

### III. EPR

#### *Experimental procedure*

EPR spectra (X-band, 9.46 GHz) were recorded on a Bruker ECS106 spectrometer in liquid nitrogen (77 K). Experimental conditions: Microwave frequency = 9.46 GHz; microwave power = 20 mW; 10 G field modulation amplitude; time constant 81.92 ms; scan time 83.89 s; 3 accumulations

**Figure S5** EPR spectra of Cu(II)-BpyAla (240  $\mu$ M) and LmrR-BpyAla-Cu(II) (240  $\mu$ M of Cu(II)) in 20 mM MOPS buffer, 150 mM NaCl at pH 7 at 77 K.

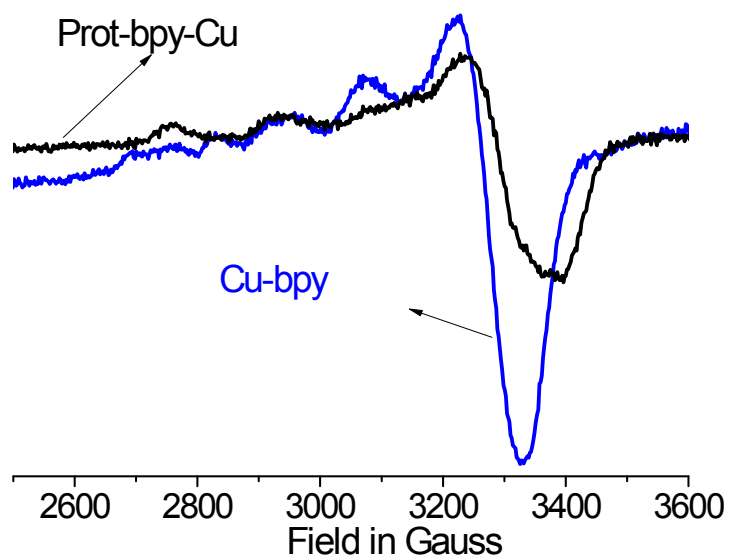

## 9. Catalysis – Friedel-Crafts reaction

### *Representative procedure for LmrR\_LM\_X\_Cu(II) catalysed Friedel-Crafts reaction*

The catalytic solution was prepared by combining  $\text{Cu}(\text{H}_2\text{O})_6(\text{NO}_3)_2$  (90  $\mu\text{M}$ , 9 % catalyst loading) in MOPS buffer (20 mM MOPS, 150mM NaCl, pH 7.0) with 1.25 equivalents of LmrR\_LM\_X (112.5  $\mu\text{M}$ ) to a final volume of 280  $\mu\text{L}$ . To this 10  $\mu\text{L}$  of a fresh stock solution of substrate **1** in  $\text{CH}_3\text{CN}$  (final concentration 2.5 mM) and 10  $\mu\text{L}$  of solution of substrate **2** in MOPS/ $\text{CH}_3\text{CN}$  was added (final concentration 1 mM). The reaction was mixed for 3 days by continuous inversion at 4  $^\circ\text{C}$ . The product was extracted with 3x 1 mL of diethyl ether, the organic layers were dried on  $\text{Na}_2\text{SO}_4$  and evaporated under reduced pressure. The product was redissolved in 150  $\mu\text{L}$  of a heptane:propan-2-ol mixture (10:1) and the conversion and enantiomeric excess were determined using HPLC (Chiralpak-AD n-heptane:iPrOH 90:10, 1ml/min).

### Characterization data of Friedel-Crafts alkylation products<sup>7</sup>

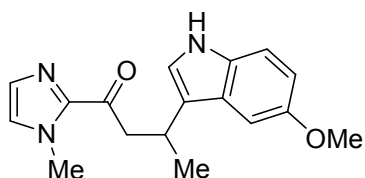

**3-(5-methoxy-1H-indol-3-yl)-1-(1-methyl-1H-imidazol-2-yl)butan-1-one (3a).**  $^1\text{H-NMR}$  ( $\text{CDCl}_3$ , 400 MHz)  $\delta$  1.41 (d, 3H,  $J = 6.9$  Hz), 3.39 (dd, 1H,  $J = 8.3$  Hz,  $J = 15.6$  Hz), 3.58 (dd, 1H,  $J = 6.2$ ,  $J = 15.6$

Hz), 3.77 – 3.84 (m, 1H), 3.86 (s, 3H), 3.94 (s, 3H), 6.82 (dd, 1H,  $J = 2.5$  Hz, 8.8 Hz), 7.00 (s, 1H), 7.03 (d, 1H,  $J = 2.4$  Hz), 7.15 (s, 1H), 7.15 – 7.16 (m, 1H), 7.20 (s, 1H), 7.21 (d, 1H,  $J = 8.8$  Hz), 8.05 (s, 1H).  $^{13}\text{C-NMR}$  ( $\text{CDCl}_3$ , 400 MHz)  $\delta$  21.5 (q), 27.2 (q), 36.2 (d), 46.7 (q), 55.9 (t), 101.0 (d), 111.7 (d), 112.1 (d), 120.9 (d), 121.2 (s), 126.9 (d), 126.9 (s), 128.9 (d), 131.5 (s), 143.3 (s), 153.7 (s), 192.4 (s). HRMS (ESI) calcd for  $\text{C}_{17}\text{H}_{20}\text{N}_3\text{O}_2$ : 298.1550 ( $[\text{M}+\text{H}]^+$ ), found 298.1550 ( $[\text{M}+\text{H}]^+$ ). Ee's were determined by HPLC analysis (Chiralcel-AD, heptane/iPrOH 90:10, 1 mL/min). Retention times: 33.0 (+) and 39.3 (-) mins.

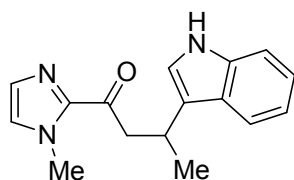

**3-(1H-indol-3-yl)-1-(1-methyl-1H-imidazol-2-yl)butan-1-one (3b).**  $^1\text{H-NMR}$  ( $\text{CD}_3\text{OD}$ , 400 MHz)  $\delta$  1.40 (d, 3H,  $J = 6.9$  Hz), 3.39 (m, 2H), 3.76 (m, 1H), 3.83 (s, 3H), 6.95 (t, 1H,  $J = 7.1$  Hz), 7.05 (t, 1H,  $J = 8.2$  Hz), 7.05 (s, 1H), 7.10 (s, 1H), 7.24 (s, 1H), 7.29 (d, 1H,  $J = 8.1$  Hz), 7.47 (d, 1H,  $J = 7.9$  Hz).  $^{13}\text{C-NMR}$  ( $\text{CDCl}_3$ , 400 MHz)  $\delta$  21.7 (q), 27.2 (t), 36.2 (d), 46.7 (q), 111.0 (d), 119.1 (d), 119.3 (d), 120.2 (d), 121.5 (s), 121.8 (d), 126.6 (s), 126.8 (d), 128.9 (d), 136.4 (s), 143.4 (s), 192.3 (s). Ee's were determined by HPLC analysis (Chiralcel-AD, heptane/iPrOH 90:10, 1 mL/min). Retention times: 25.4 (+) and 33.2 (-) mins.

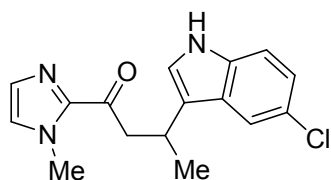

**3-(5-chloro-1H-indol-3-yl)-1-(1-methyl-1H-imidazol-2-yl)butan-1-one (3c).**  $^1\text{H-NMR}$  ( $\text{CD}_3\text{OD}$ , 400 MHz)  $\delta$  1.40 (d, 3H,  $J = 6.9$ ), 3.35 (d, 2H,  $J = 7.2$  Hz), 3.71 (m, 1H), 3.38 (s, 3H), 7.01 (dd, 1H,  $J = 8.6$  Hz,  $J = 2.0$  Hz), 7.11 (d, 1H,  $J = 0.9$  Hz), 7.12 (s, 1H), 6.25 (d, 1H,  $J = 8.6$  Hz), 7.27 (s, 1H), 7.28 (d, 1H,  $J = 2.0$  Hz).  $^{13}\text{C-NMR}$  ( $\text{CDCl}_3$ , 400 MHz)  $\delta$  21.6 (q), 27.1 (d), 36.1 (q), 46.9 (t), 112.0 (d), 118.7 (d), 121.3 (s), 121.6 (d), 122.1 (d), 124.8 (s), 127.0 (d), 127.7 (s), 128.9 (d), 134.7 (s), 143.2 (s), 192.0 (s). HRMS (ESI) calcd for  $\text{C}_{16}\text{H}_{17}\text{N}_3\text{O}$ : 302.1055 ( $[\text{M}+\text{H}]^+$ ), found 302.1054 ( $[\text{M}+\text{H}]^+$ ). Ee's were determined by HPLC analysis (Chiralcel-AD, heptane/iPrOH 90:10, 1 mL/min). Retention times: 18.4 (+) and 22.1 (-) mins.

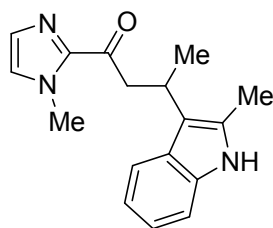

**1-(1-methyl-1H-imidazol-2-yl)-3-(2-methyl-1H-indol-3-yl)butan-1-one (3d).**  $^1\text{H-NMR}$  ( $\text{CD}_3\text{OD}$ , 400 MHz)  $\delta$  1.45 (d, 3H,  $J = 7.1$  Hz), 2.31 (s, 3H), 3.41 – 3.53 (m, 2H), 3.73 (s, 3H), 3.70 – 3.77 (m, 1H), 6.88 (t, 1H,  $J = 7.0$  Hz), 6.94 (t, 1H,  $J = 7.8$  Hz), 7.05 (s, 1H), 7.14 (d, 1H,  $J = 9.2$  Hz), 7.19 (s, 1H), 7.49 (d, 1H,  $J = 7.6$  Hz).  $^{13}\text{C-NMR}$  ( $\text{CDCl}_3$ , 400 MHz)  $\delta$  12.3 (q), 21.1 (d), 27.0 (q), 36.0 (q), 46.2 (t), 110.1 (d), 115.4 (s), 118.9 (d), 119.2 (d), 120.5 (d), 126.5 (d), 127.4 (s), 128.8 (d), 130.3 (s), 135.3 (s), 143.3 (s), 192.3 (s). HRMS (ESI) calcd for  $\text{C}_{17}\text{H}_{20}\text{N}_3\text{O}$ : 282.1601 ( $[\text{M}+\text{H}]^+$ ), found 282.1600 ( $[\text{M}+\text{H}]^+$ ). Ee's were determined by HPLC analysis (Chiralcel-AD, heptane/iPrOH 90:10, 1 mL/min). Retention times: 16.0 (-) and 21.9 (+) mins.

**Table S2** Results of the control experiments of vinylogous Friedel-Crafts reaction of **1a/b/c/d** and **2** resulting in **3a/b/c/d**.<sup>a</sup>

| Entry | Catalyst                          | Substrate | Product   | Conversion (%) | ee (%) |
|-------|-----------------------------------|-----------|-----------|----------------|--------|
| 1     | LmrR_LM_N19X                      | <b>1a</b> | <b>3a</b> | <1             | -      |
| 2     | LmrR_LM_M89X                      | <b>1a</b> | <b>3a</b> | <1             | -      |
| 3     | LmrR_LM_F93X                      | <b>1a</b> | <b>3a</b> | <1             | -      |
| 4     | LmrR_LM_M89X_K22A                 | <b>1a</b> | <b>3a</b> | <1             | -      |
| 5     | LmrR_LM_M89X_H86A                 | <b>1a</b> | <b>3a</b> | <1             | -      |
| 6     | <i>L</i> -BpyAla_Cu <sup>II</sup> | <b>1a</b> | <b>3a</b> | 74 ± 6         | <5     |
| 7     | <i>L</i> -BpyAla_Cu <sup>II</sup> | <b>1b</b> | <b>3b</b> | 84 ± 10        | <5     |
| 8     | <i>L</i> -BpyAla_Cu <sup>II</sup> | <b>1c</b> | <b>3c</b> | 72 ± 9         | <5     |
| 9     | <i>L</i> -BpyAla_Cu <sup>II</sup> | <b>1d</b> | <b>3d</b> | 89 ± 5         | <5     |

<sup>a</sup> Typical conditions: Entry 1-5 112.5 μM LmrR\_LM\_X in 20 mM MOPS buffer (pH 7.0), 150 mM NaCl, for 3 days at 4 °C. Entry 6-9 9 mol% Cu(H<sub>2</sub>O)<sub>6</sub>(NO<sub>3</sub>)<sub>2</sub> (90 μM) loading with 1.25 eq of ligand *L*-BpyAla (92% ee, see above, chapter 2) in 20 mM MOPS buffer (pH 7.0), 150 mM NaCl, for 3 days at 4 °C.

**Table S3.** Effect of catalyst loading on the results of the vinylogous Friedel-Crafts alkylation reaction of **1a** and **2** resulting in **3a**.<sup>a</sup>

| Cu(H <sub>2</sub> O) <sub>6</sub> (NO <sub>3</sub> ) <sub>2</sub> | Catalyst                      | conversion (%) | ee (%)     |
|-------------------------------------------------------------------|-------------------------------|----------------|------------|
| 30 μM                                                             | LmrR_LM_N19X_Cu <sup>II</sup> | 15 ± 4         | 19 ± 3 (+) |
| 90 μM                                                             | LmrR_LM_N19X_Cu <sup>II</sup> | 18 ± 2         | 29 ± 2 (+) |
| 30 μM                                                             | LmrR_LM_M89X_Cu <sup>II</sup> | 29 ± 3         | 36 ± 4 (+) |
| 90 μM                                                             | LmrR_LM_M89X_Cu <sup>II</sup> | 27 ± 6         | 49 ± 4 (+) |
| 30 μM                                                             | LmrR_LM_F93X_Cu <sup>II</sup> | 37 ± 4         | 8 ± 2 (-)  |
| 90 μM                                                             | LmrR_LM_F93X_Cu <sup>II</sup> | 36 ± 3         | 22 ± 1 (-) |

<sup>a</sup> Typical conditions: 1.25 eq LmrR\_LM\_X compared to Cu(H<sub>2</sub>O)<sub>6</sub>(NO<sub>3</sub>)<sub>2</sub>, 20 mM MOPS buffer (pH 7.0), 150 mM NaCl, for 3 days at 4 °C

**Figure S6** Chiral HPLC traces of products of the Friedel-Crafts reaction catalysed by **LmrR\_LM\_X\_Cu<sup>II</sup>**.

**3a** Chiralpak-AD n-heptane:iPrOH 90:10, 1ml/min

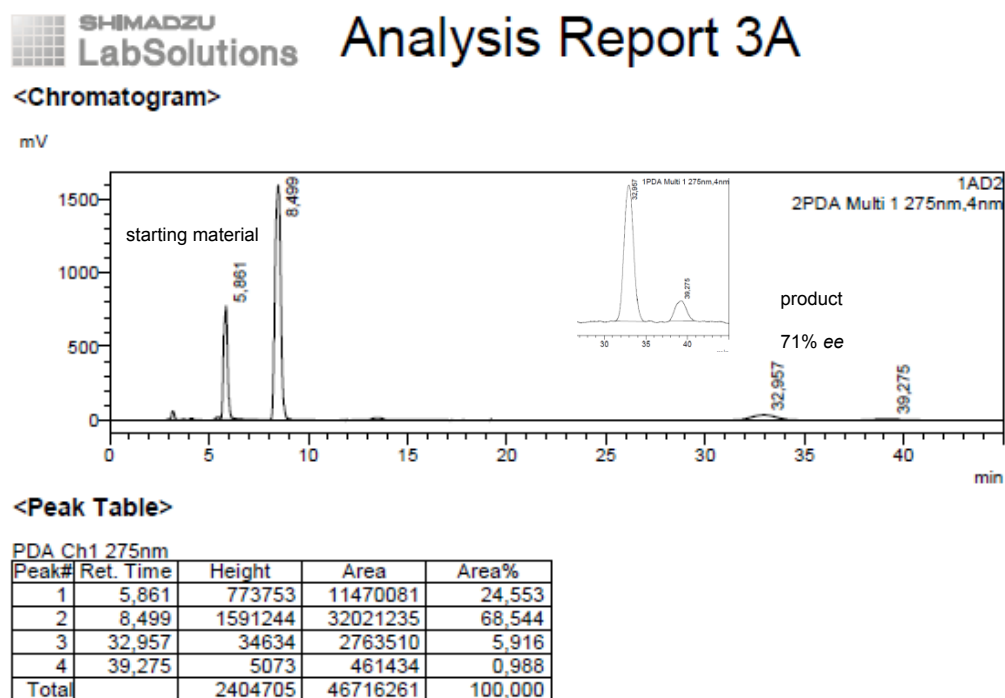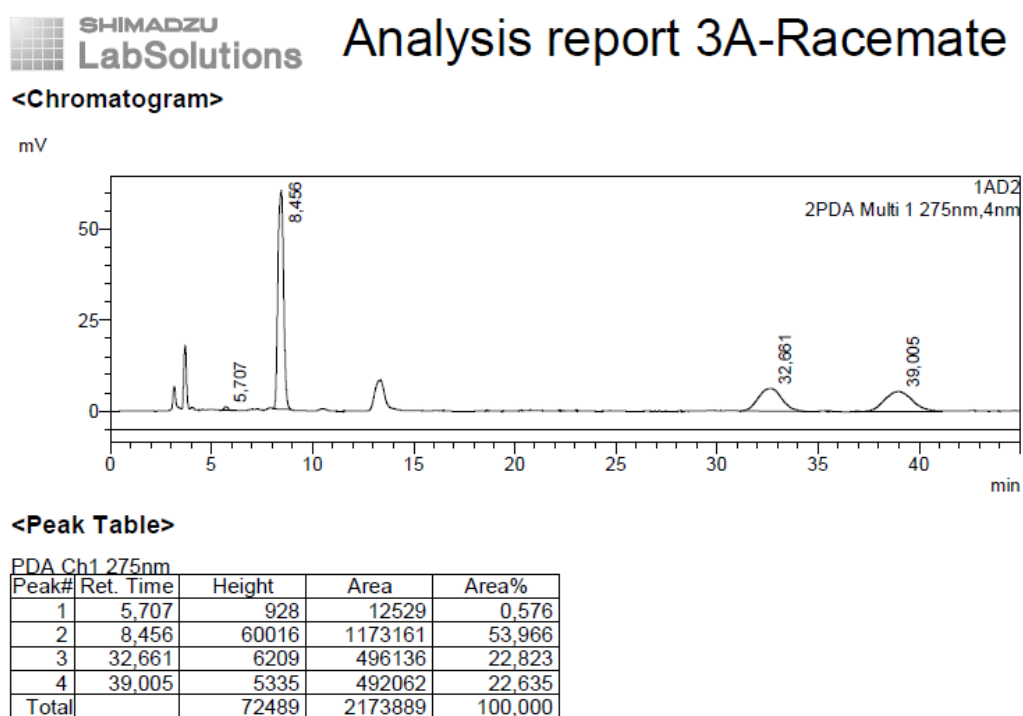

3b Chiralpak-AD n-heptane:iPrOH 90:10, 1ml/min

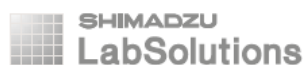

## Analysis report 3B

### <Chromatogram>

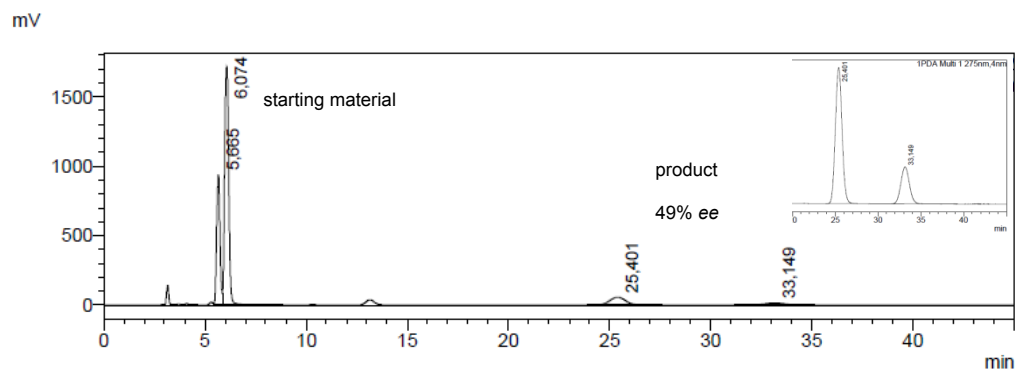

### <Peak Table>

PDA Ch1 275nm

| Peak# | Ret. Time | Height  | Area     | Area%   |
|-------|-----------|---------|----------|---------|
| 1     | 5.665     | 935025  | 10822279 | 27.385  |
| 2     | 6.074     | 1717401 | 24524137 | 62.057  |
| 3     | 25.401    | 56967   | 3103921  | 7.854   |
| 4     | 33.149    | 15453   | 1068089  | 2.703   |
| Total |           | 2724846 | 39518426 | 100.000 |

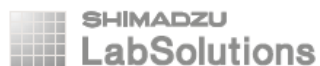

## Analysis report 3B-Racemate

### <Chromatogram>

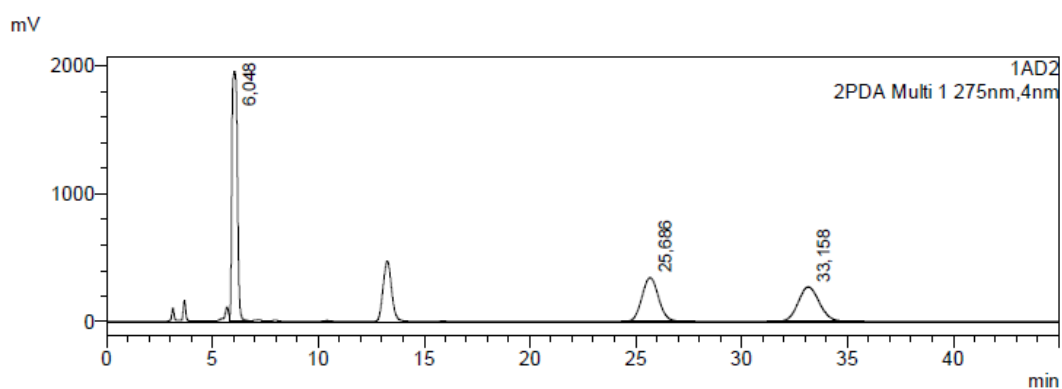

### <Peak Table>

PDA Ch1 275nm

| Peak# | Ret. Time | Height  | Area     | Area%   |
|-------|-----------|---------|----------|---------|
| 1     | 6.048     | 1953598 | 35192368 | 48.430  |
| 2     | 25.686    | 342539  | 18630056 | 25.638  |
| 3     | 33.158    | 270802  | 18843622 | 25.932  |
| Total |           | 2566939 | 72666046 | 100.000 |

3c Chiralpak-AD n-heptane:iPrOH 90:10, 1ml/min

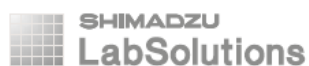

## Analysis report 3C

### <Chromatogram>

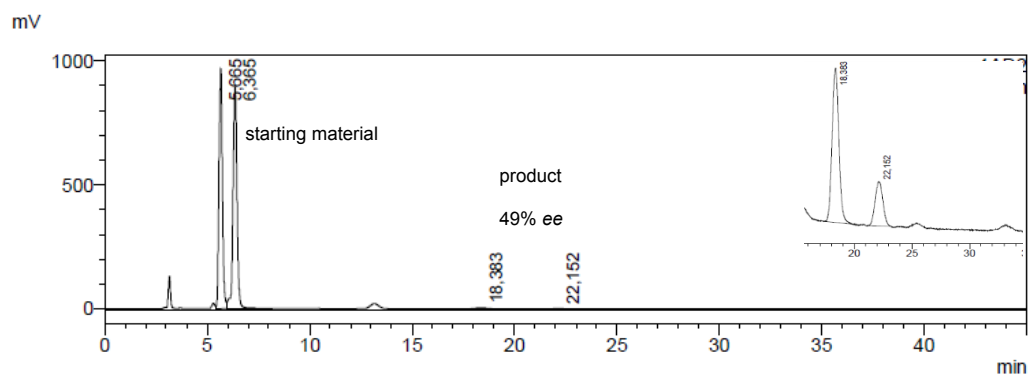

### <Peak Table>

PDA Ch1 275nm

| Peak# | Ret. Time | Height  | Area     | Area%   |
|-------|-----------|---------|----------|---------|
| 1     | 5.665     | 968032  | 11386171 | 47.487  |
| 2     | 6.365     | 892397  | 12370318 | 51.592  |
| 3     | 18.383    | 4157    | 164200   | 0.685   |
| 4     | 22.152    | 1216    | 56745    | 0.237   |
| Total |           | 1865802 | 23977434 | 100.000 |

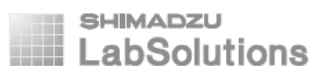

## Analysis report 3C-Racemate

### <Chromatogram>

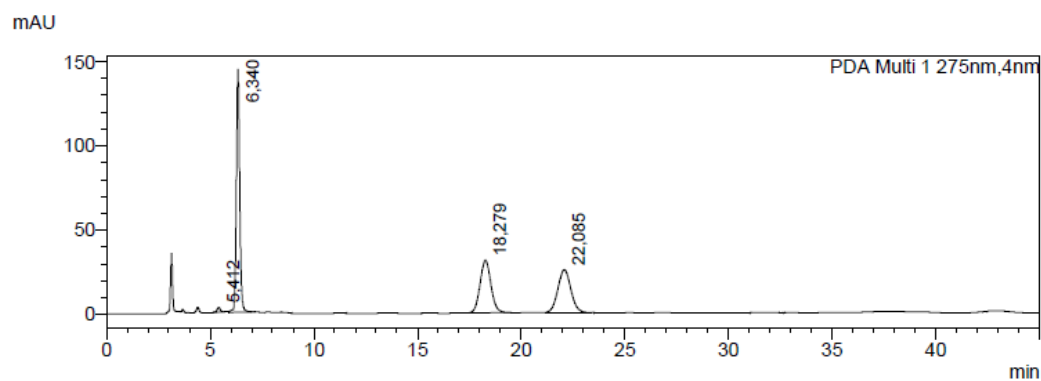

### <Peak Table>

PDA Ch1 275nm

| Peak# | Ret. Time | Height | Area    | Area%   |
|-------|-----------|--------|---------|---------|
| 1     | 5.412     | 2883   | 31925   | 0.810   |
| 2     | 6.340     | 144297 | 1659875 | 42.138  |
| 3     | 18.279    | 31257  | 1144238 | 29.048  |
| 4     | 22.085    | 25450  | 1103093 | 28.003  |
| Total |           | 203887 | 3939131 | 100.000 |

3d Chiralpak-AD n-heptane:iPrOH 90:10, 1ml/min

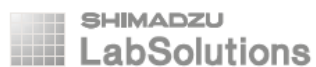

## Analysis report 3D

### <Chromatogram>

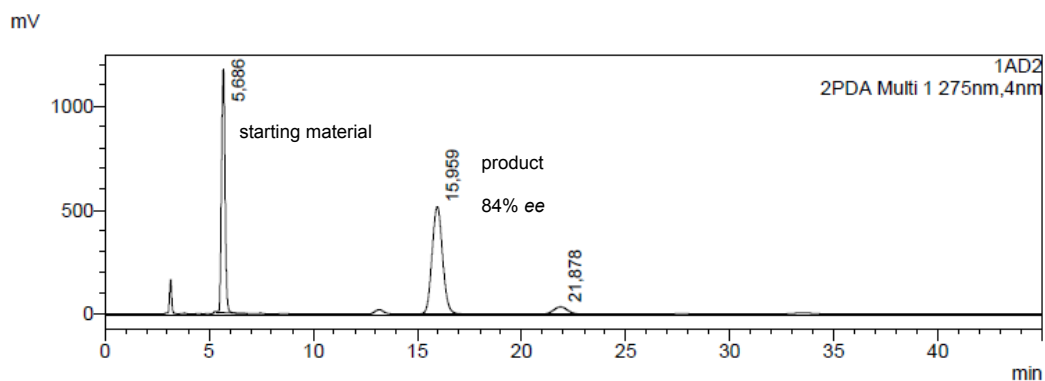

### <Peak Table>

PDA Ch1 275nm

| Peak# | Ret. Time | Height  | Area     | Area%   |
|-------|-----------|---------|----------|---------|
| 1     | 5.686     | 1171769 | 13819003 | 41,060  |
| 2     | 15.959    | 516652  | 18204096 | 54,090  |
| 3     | 21.878    | 35177   | 1632369  | 4,850   |
| Total |           | 1723598 | 33655468 | 100,000 |

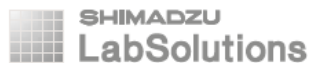

## Analysis report 3D-Racemate

### <Chromatogram>

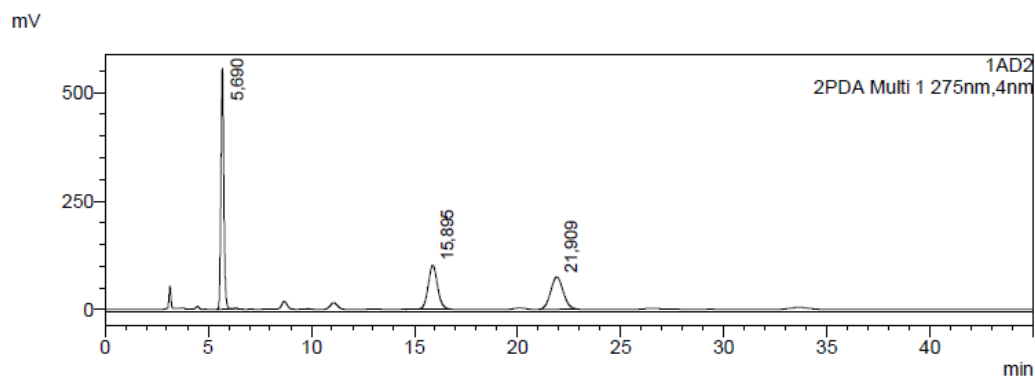

### <Peak Table>

PDA Ch1 275nm

| Peak# | Ret. Time | Height | Area     | Area%   |
|-------|-----------|--------|----------|---------|
| 1     | 5.690     | 554288 | 5454685  | 46,404  |
| 2     | 15.895    | 101102 | 3165296  | 26,928  |
| 3     | 21.909    | 74091  | 3134885  | 26,669  |
| Total |           | 729481 | 11754866 | 100,000 |

## 9. References

1. N. C. Fletcher, M. Nieuwenhuyzen, and S. Rainey, *J. Chem. Soc. Dalt. Trans.*, 2001, 2641.
2. B. Imperiali, T. J. Prins, and S. L. Fisher, *J. Org. Chem.*, 1993, **58**, 1613.
3. J. Xie, W. Liu, and P. G. Schultz, *Angew. Chem. Int. Ed. Engl.*, 2007, **46**, 9239.
4. J. Bos, A. García-Herraiz, and G. Roelfes, *Chem. Sci.*, 2013, **4**, 3578.
5. F. Menges, "Spekwin32 - optical spectroscopy software", Version 1.71.6.1, 2012, <http://www.effemm2.de/spekwin/>
6. ASTM E1840-96(2007) Standard Guide for Raman Shift Standards for Spectrometer Calibration, ASTM International, **DOI:** 10.1520/E1840-96R07
7. A.J. Boersma, B.L. Feringa and G. Roelfes *Angew. Chem. Int. Ed. Engl.* 2009, 48, 3346
